# Supplementary material
Source: PubMed Central journal article supplement (PMC3311329)
Supplement: 1200790109_sapp.pdf [file 1200790109_sapp.pdf]

## On a Fundamental Structure of Gene Networks in Living Cells

Nataly Kravchenko-Balasha<sup>a,b</sup>, Alexander Levitzki<sup>a</sup>, Andrew Goldstein<sup>c</sup>,  
Varda Rotter<sup>d</sup>, A. Gross<sup>b</sup>, F. Remacle<sup>b,e</sup> and R. D. Levine<sup>b,f,\*</sup>

- a. Unit of Cellular Signaling, Department of Biological Chemistry, The Alexander Silberman Institute of Life Sciences, The Hebrew University of Jerusalem, Jerusalem 91904, Israel
- b. The Fritz Haber Research Center for Molecular Dynamics, The Institute of Chemistry, The Hebrew University of Jerusalem, Jerusalem 91904, Israel
- c. Molecular Biology Institute, David Geffen School of Medicine, University of California, Los Angeles, CA 90095
- d. Department of Molecular Cell Biology, Weizmann Institute of Science, Rehovot 76100, Israel
- e. Département de Chimie, B6c, Université de Liège, B4000 Liège, Belgium
- f. Crump Institute for Molecular Imaging and Department of Molecular and Medical Pharmacology, David Geffen School of Medicine, University of California, Los Angeles, CA 90095

---

\* Corresponding author.

## Table of Contents

|                                                                                             |    |
|---------------------------------------------------------------------------------------------|----|
| 1. Surprisal analysis and connectivity matrix                                               | 3  |
| 2. $G_{i0}$ distribution between functional groups                                          | 6  |
| 3. Stability of transcripts defines connectivity                                            | 8  |
| 4. Tables S1-S20                                                                            | 9  |
| 5. Identification of transcripts mostly contributing to the process of transformation       | 32 |
| 6. Stable transcripts of the steady state participate less in the process of transformation | 33 |
| 7. Description of Experimental studies used in the manuscript                               | 34 |
| 8. References of the supplemental info                                                      | 38 |
| 9. Figure S1 to S12                                                                         |    |

## 1. Surprisal analysis and the connectivity matrix

Surprisal analysis (1, 2) of microarray data provides an exact or at least a good approximation for the logarithm of the expression level of the transcripts. For gene  $i$  at the time point  $T$  we use the representation of its expression level (3, 4):

$$\ln X_i(t_T) = \ln X_i^0 - \sum_{\alpha=1} G_{i\alpha} \lambda_{\alpha}(t_T) \quad [\text{S.1}]$$

Surprisal analysis seeks to keep few terms in the sum in equation [S.1] while still providing an accurate representation of the experimental data.

The zeroth term,  $\ln X_i^0$ , is the ‘secular’, the time-invariant, part of the level of expression. This term is the gene expression level at maximal entropy (3, 4). It is definitely not a uniform distribution and different transcripts can have fold differences in their level. It is this variation of the zeroth order term as a function of the gene index,  $i$ , written as  $-\ln X_i^0 = G_{i0} \lambda_0$  and plotted in figure 2 of the main text that makes our work distinct from studies where entropy is used as a statistical measure.

The  $\alpha = 1, 2, \dots$  terms in equation [S.1] reduce the entropy from its maximal value due to the presence of process constraints of the biology.  $\alpha = 1, 2, \dots$  labels the different possible transcription patterns (= phenotypes) where  $\lambda_{\alpha}(t_T)$  is the weight of the phenotype  $\alpha$  at time point  $T$ .  $G_{i\alpha}$  is the weight of gene  $i$  in the transcription pattern  $\alpha$ . In technical terms, see scheme in (4), each transcription pattern is a constraint on the entropy.  $\lambda_{\alpha}(t_T)$  is a measure of how much the entropy is reduced below its maximal value due to the constraint. We therefore index the successive terms in equation [S.1] such that the first,  $\alpha = 1$ , term is the major contribution. In the language of maximal entropy, it is the dominant constraint. Next is the  $\alpha = 2$  term etc. As shown in (3, 4), keeping even the one,  $\alpha = 1$ , dominant constraint term already provides a semi-quantitative representation for the expression level and its temporal evolution.

To determine the succession of terms for equation [S.1] all the way to an exact representation, we proceed as follows. Taking the microarray data in the form of expression levels  $X_i(t_T)$  for gene  $i$  at the time  $T$  we take the logarithm of each entry. Say that there are  $A$  time points that were measured,  $T = 1, 2, \dots, A+1$ . We form the  $A+1$  by  $A+1$  symmetric connectivity matrix  $\mathbf{C}$  such that its matrix elements are given

by  $C_{T,T'} = \sum_i \ln(X_i(t_T)) \ln(X_i(t_{T'}))$ . If we introduce the N by A+1 matrix  $\mathbf{Y}$  where  $Y_{iT} = \ln(X_i(t_T))$  we can write the connectivity matrix as a matrix product

$$\mathbf{C} = \mathbf{Y}^T \mathbf{Y} \quad [\text{S.2}]$$

where the superscript T denotes the transpose of the matrix.

The matrix  $\mathbf{C}$  is not quite but almost the covariance matrix of the information provided by the expression levels at two times.

$\mathbf{C}$  is a symmetric matrix and can be diagonalized. There are A+1 eigenvectors and eigenvalues. We here discuss the common case where all the eigenvalues of  $\mathbf{C}$  are positive. Then the eigenvalue equations as

$$\mathbf{C} \mathbf{P}_\alpha = \omega_\alpha^2 \mathbf{P}_\alpha \quad , \alpha = 0, 1, 2, \dots, A \quad [\text{S.3}]$$

The eigenvectors are normalized by the condition  $\sum_{T=0}^A P_{T\alpha}^2 = 1$ .

To write the secular term in a manner analogous to the terms of the constraints we define

$$\begin{aligned} \ln X_i^0 &= G_{i\alpha=0} \lambda_{\alpha=0} \\ \lambda_{\alpha=0} &= \omega_{\alpha=0} P_{T\alpha=0} \end{aligned} \quad [\text{S.4}]$$

The secular expression level is, by definition, not time dependent.

The weights  $\lambda_\alpha(t_T)$  of the different phenotypes are computed by an equation analogous to that for  $\lambda_{\alpha=0}$  namely we write for each term  $\lambda_\alpha(t_T)$

$$\lambda_\alpha(t_T) = P_{T\alpha} \omega_\alpha \quad [\text{S.5}]$$

$G_{i\alpha}$ , the weight of gene  $i$  in the transcription pattern  $\alpha$  can also be determined by an eigenvalue equation for an N by N matrix  $\mathbf{Y}\mathbf{Y}^T$ , (3, 4). In practice the vector  $\mathbf{G}_\alpha$  whose components are the  $G_{i\alpha}$ 's can be computed with more modest computer storage requirements as

$$\mathbf{G}_\alpha = \omega_\alpha^{-1} \mathbf{Y} \mathbf{P}_\alpha \quad [\text{S.6}]$$

We point out that the definition through equation [S.6] produces a vector that is

normalized:  $\mathbf{G}_\alpha^T \mathbf{G}_\alpha = \mathbf{P}_\alpha^T \mathbf{Y}^T \omega_\alpha^{-2} \mathbf{Y} \mathbf{P}_\alpha = \mathbf{P}_\alpha^T \mathbf{P}_\alpha = 1$ . In particular the vector  $\mathbf{G}_0$  is normalized. This is important because normalization ensures that the individual components of the vector, the  $G_{i0}$ 's, have only a bounded scope for variation. As a rough guide  $G_{i0}^2 \approx 1/N$  where  $N$  is the number of transcripts. There are variations about the average, see figure 2 of the main text, but the estimate is useful for comparing arrays of different sizes.

The connectivity matrix as shown latter in Section 3 ,equation [S.8], follows from the definition by equation [S.2] and from equation [S.6]

$$\mathbf{C} = \sum_{\alpha=0} \omega_\alpha^2 \mathbf{G}_\alpha^T \mathbf{G}_\alpha = \omega_0^2 \mathbf{G}_0^T \mathbf{G}_0 + \sum_{\alpha=1} \omega_\alpha^2 \mathbf{G}_\alpha^T \mathbf{G}_\alpha \quad [\text{S.7}]$$

This result is sometimes known as the spectral representation of a matrix.

## 2. $G_{i0}$ distribution between functional groups

In the cellular models analyzed, transcripts with the lowest  $G_0$  values (for example, below -0.0125 in HF1 cells, Figure S11, Table S7) belong to ribosome, protein translation and energy pathways' modules. The transcripts with mid  $G_{i0}$  values (-0.005-(-0.01) in HF1 cells, Figure S11) participate in the cell cycle and DNA/RNA metabolism (Table S8). The transcripts with the highest  $G_{i0}$  values (for example, greater than -0.0005 in HF1 cells, Figure S11) usually participate in signal transduction, morphogenesis and cell communication modules (Table S9). In addition, two additional examples of normal cells (TGF $\beta$  treated hematopoietic stem cells and dendritic differentiated cells) were analyzed. The distributions of the  $G_{i0}$  values between the functional groups of the steady state (Figure S12, Tables S10-S13) are found to be similar.

Moreover the scalar product between the stem and differentiated cells is

$\sum_i G_{i0}^{(\text{den})} G_{i0}^{(\text{hemat})} = 0.973$  (see for details the section "Quantifying the conservation of the steady state pattern in different cells" of the manuscript). In contrast to the conservation of the steady state the transcription patterns that characterize the process of TGF $\beta$  treatment vary significantly between two cell types,  $\sum_i G_{i1}^{(\text{den})} G_{i1}^{(\text{hemat})} = -0.18$ .

In yeast a similar picture was observed in the lowest (less than -0.016) and mid  $G_{i0}$  (-0.012 to -0.015), Figure S9, Tables S14 and S15). There is a small number of significant categories for the transcripts with high  $G_{i0}$  (greater than -0.011) and among them sexual reproduction categories are present (Table S16). These categories include and are regulated by signal transduction and cell communication transcript, that extensively have been used by multicellular organisms. We see, for example, transcripts with high  $G_{0i}$ , as was revealed by KEGG analysis tool, participate in the MAPK signaling, whereas transcripts with low  $G_{0i}$  do not.

Lowest  $G_{i0}$  values and mid  $G_{i0}$  values in E.Coli included similar functional groups (lowest  $G_{i0}$  included translation and energy pathways, Table S19; mid  $G_{i0}$  included

RNA/DNA metabolism and cell cycle, Table 20) . Analysis of the high  $G_{0i}$  values in *E. Coli* did not show significant biological categories.

### 3. Stability of Transcripts Defines Connectivity

The connectivity matrix is determined by the means and correlations between the fold values,  $Y_i = \ln X_i$ , of the transcripts:

$$\begin{aligned}
 \underbrace{\overline{Y_i Y_j}}_{\text{connectivity}} &= \underbrace{\overline{Y_i} \overline{Y_j}}_{\text{factored product of two means}} - \underbrace{\overline{(Y_i - \overline{Y_i})(Y_j - \overline{Y_j})}}_{\text{covariance between expression levels of transcripts } i \text{ and } j} \quad [\text{S.8}] \\
 &= \sum_{\alpha=0} \omega_{\alpha}^2 G_{i\alpha} G_{j\alpha} = \omega_0^2 G_{i0} G_{j0} + \sum_{\alpha=1} \omega_{\alpha}^2 G_{i0} G_{j0}
 \end{aligned}$$

A description of the derivation of equation [S.8] is provided in the Section 1 of the SI.  $\omega_{\alpha}$  determines the magnitude of  $\lambda_{\alpha}$  ((3, 4) and Section 1 of the SI). As we saw,  $\lambda_0$  is much larger than the other  $\lambda_{\alpha}$ . Therefore the main contribution to the connectivity is defined by the steady state contribution  $\omega_0^2 G_{i0} G_{j0}$ . The overall weight is determined by the value of  $\omega_0^2$  while the connectivity of two transcripts is set by the product  $G_{i0} G_{j0}$ . Both  $G_{i0}$  and  $G_{j0}$  need to have a large value in order to be well connected. Therefore transcripts with stable gene expressions and low free energy are more connected.

The full connectivity, as shown in equation [S.8], also depends on the particular constraints of the biological process under study. But these terms are significantly smaller, see equation [1] of the main text, and represent a small perturbation of the robust steady state connectivity.



#### 4. Tables

**Table S1:** Computed values of the weights,  $\lambda_\alpha(t_T)$ , for the trajectories 15781012,157811,157810, 15789,1578.

| $t_T$ | $\alpha=0$ | $\alpha=1$ | $\alpha=2$ | $\alpha=3$ | $\alpha=4$ | $\alpha=5$ |
|-------|------------|------------|------------|------------|------------|------------|
| 1     | -407.6     | -23.72     | -10.31     | 2.74       | -8.00      | -8.05      |
| 5     | -405.4     | -22.42     | -12.09     | -0.80      | 6.78       | 8.70       |
| 7     | -406.6     | -21.34     | 23.12      | -2.30      | 1.86       | -0.67      |
| 8     | -405.0     | 22.98      | -0.56      | 12.54      | 8.51       | -4.78      |
| 10    | -406.9     | 21.59      | 3.34       | 5.17       | -10.31     | 7.58       |
| 12    | -404.7     | 23.09      | -3.53      | -17.40     | 1.25       | -2.77      |
| 1     | -407.8     | -19.52     | -10.77     | 4.69       | -10.35     |            |
| 5     | -405.7     | -17.42     | -12.07     | -3.96      | 10.52      |            |
| 7     | -406.8     | -17.76     | 23.18      | -0.58      | 0.46       |            |
| 8     | -404.8     | 28.24      | 0.48       | 12.24      | 3.37       |            |
| 11    | -403.9     | 26.80      | -0.83      | -12.44     | -3.95      |            |
| 1     | -407.8     | -19.49     | 10.36      | 7.04       | -9.16      |            |
| 5     | -405.6     | -18.75     | 11.81      | -5.89      | 9.47       |            |
| 7     | -406.8     | -16.51     | -23.35     | -1.85      | -0.42      |            |
| 8     | -404.8     | 28.46      | 2.90       | -9.89      | -5.78      |            |
| 10    | -406.7     | 26.43      | -1.69      | 10.51      | 5.92       |            |
| 1     | -407.9     | 18.85      | -10.09     | -5.34      | 10.76      |            |
| 5     | -405.6     | 19.25      | -11.97     | 2.10       | -10.62     |            |
| 7     | -406.8     | 16.88      | 23.24      | 2.77       | -0.17      |            |
| 8     | -404.8     | -26.71     | -3.51      | 16.24      | 2.51       |            |
| 9     | -405.9     | -28.47     | 2.30       | -15.71     | -2.52      |            |
| 1     | -408.1     | -13.09     | -10.71     | -11.40     |            |            |
| 5     | -405.9     | -11.74     | -11.95     | 11.25      |            |            |
| 7     | -407.0     | -11.08     | 23.26      | 0.52       |            |            |
| 8     | -404.4     | 36.15      | -0.62      | -0.31      |            |            |

**Table S2:** Computed values of the weights,  $\lambda_\alpha(t_T)$ , for the TGF $\beta$  treated A549 cells. Cells were treated for 0 -72 hours as indicated in the table.

| $t_T$ | $\alpha=0$ | $\alpha=1$ | $\alpha=2$ | $\alpha=3$ | $\alpha=4$ | $\alpha=5$ | $\alpha=6$ | $\alpha=7$ | $\alpha=8$ |
|-------|------------|------------|------------|------------|------------|------------|------------|------------|------------|
| 0     | 1046.2     | -39.4      | -19.2      | -15.2      | -6.5       | 1.1        | -7.5       | 6.2        | -2.9       |
| 0.5   | 1046.8     | -38.3      | -10.6      | -8.2       | 1.1        | -6.0       | 9.0        | -4.4       | 5.9        |
| 1     | 1048.9     | -33.1      | -1.5       | 5.6        | 3.5        | 8.9        | -0.3       | -9.1       | 2.2        |
| 2     | 1049.2     | -30.4      | 6.1        | 14.7       | 14.7       | -1.1       | 0.3        | 9.6        | -1.4       |
| 4     | 1050.2     | -14.0      | 17.6       | 10.3       | -8.3       | -5.4       | -5.5       | -6.8       | -6.7       |
| 8     | 1049.4     | 10.7       | 22.1       | -1.8       | -13.4      | 3.6        | 7.6        | 6.5        | -0.1       |
| 16    | 1049.8     | 40.5       | 15.1       | -7.3       | 4.2        | -1.1       | -6.8       | 0.1        | 12.4       |
| 24    | 1047.6     | 49.4       | 0.7        | -13.8      | 10.4       | 0.4        | 2.5        | -2.9       | -10.8      |
| 72    | 1048.2     | 54.5       | -30.4      | 15.8       | -5.7       | -0.3       | 0.7        | 0.7        | 1.4        |

**Table S3.** Over-represented biological processes within the transcripts with the lowest  $G_{i0}$  value in trj 15781012 as identified by EASE software (5). Biological categories that are significantly over-represented (EASE score  $< 0.05$ ) among the 500 transcripts with the lowest  $G_{i0}$ . Note that the biological processes are not autonomous and many of the categories overlap. (List hits, number of genes with particular GO term in the gene list; List total, number of genes in the gene list mapped to any GO term; Population hits, number of genes with particular GO term in the whole chip; Population total, number of genes in the whole chip mapped to any GO term; EASE score (a conservative variant of the one-tailed Fisher's exact probability), a level of confidence that particular GO term is over-represented in the gene list.

| <b>Gene Category</b>                           | <b>List Hits</b> | <b>List Total</b> | <b>Population Hits</b> | <b>Population Total</b> | <b>EASE score</b> |
|------------------------------------------------|------------------|-------------------|------------------------|-------------------------|-------------------|
| protein biosynthesis                           | 92               | 474               | 372                    | 8049                    | 5.15E-34          |
| macromolecule biosynthesis                     | 112              | 474               | 630                    | 8049                    | 6.80E-28          |
| biosynthesis                                   | 116              | 474               | 753                    | 8049                    | 2.52E-23          |
| protein metabolism                             | 170              | 474               | 1670                   | 8049                    | 5.49E-15          |
| translation                                    | 28               | 474               | 125                    | 8049                    | 2.35E-09          |
| translational elongation                       | 9                | 474               | 15                     | 8049                    | 5.98E-07          |
| cytoplasm organization and biogenesis          | 37               | 474               | 291                    | 8049                    | 1.54E-05          |
| main pathways of carbohydrate metabolism       | 15               | 474               | 68                     | 8049                    | 3.16E-05          |
| ribosome biogenesis                            | 11               | 474               | 37                     | 8049                    | 3.69E-05          |
| ribosome biogenesis and assembly               | 11               | 474               | 38                     | 8049                    | 4.74E-05          |
| energy pathways                                | 26               | 474               | 184                    | 8049                    | 6.89E-05          |
| glucose catabolism                             | 11               | 474               | 41                     | 8049                    | 9.59E-05          |
| metabolism                                     | 302              | 474               | 4489                   | 8049                    | 0.00021           |
| ATP metabolism                                 | 8                | 474               | 23                     | 8049                    | 0.000249          |
| actin cytoskeleton organization and biogenesis | 12               | 474               | 56                     | 8049                    | 0.000343          |
| alcohol catabolism                             | 11               | 474               | 48                     | 8049                    | 0.000386          |
| monosaccharide catabolism                      | 11               | 474               | 48                     | 8049                    | 0.000386          |
| hexose catabolism                              | 11               | 474               | 48                     | 8049                    | 0.000386          |
| actin filament-based process                   | 12               | 474               | 57                     | 8049                    | 0.000403          |
| cell organization and biogenesis               | 46               | 474               | 460                    | 8049                    | 0.000447          |
| purine nucleoside triphosphate metabolism      | 9                | 474               | 34                     | 8049                    | 0.000626          |
| ribonucleoside triphosphate metabolism         | 9                | 474               | 34                     | 8049                    | 0.000626          |
| purine ribonucleoside triphosphate metabolism  | 9                | 474               | 34                     | 8049                    | 0.000626          |
| energy derivation by oxidation of organic      | 17               | 474               | 111                    | 8049                    | 0.000717          |

|                                                 |     |     |      |      |          |
|-------------------------------------------------|-----|-----|------|------|----------|
| compounds                                       |     |     |      |      |          |
| physiological process                           | 420 | 474 | 6713 | 8049 | 0.000732 |
| nucleoside phosphate metabolism                 | 7   | 474 | 20   | 8049 | 0.000762 |
| ATP biosynthesis                                | 7   | 474 | 20   | 8049 | 0.000762 |
| glycolysis                                      | 9   | 474 | 35   | 8049 | 0.00077  |
| nucleoside triphosphate metabolism              | 9   | 474 | 36   | 8049 | 0.00094  |
| glucose metabolism                              | 12  | 474 | 64   | 8049 | 0.001119 |
| group transfer coenzyme metabolism              | 8   | 474 | 29   | 8049 | 0.001164 |
| purine ribonucleotide metabolism                | 10  | 474 | 46   | 8049 | 0.001213 |
| purine nucleoside triphosphate biosynthesis     | 8   | 474 | 31   | 8049 | 0.001771 |
| purine ribonucleoside triphosphate biosynthesis | 8   | 474 | 31   | 8049 | 0.001771 |
| ribonucleoside triphosphate biosynthesis        | 8   | 474 | 31   | 8049 | 0.001771 |
| proton transport                                | 10  | 474 | 49   | 8049 | 0.001933 |
| ubiquitin-dependent protein catabolism          | 13  | 474 | 79   | 8049 | 0.002057 |
| modification-dependent protein catabolism       | 13  | 474 | 79   | 8049 | 0.002057 |
| nucleoside triphosphate biosynthesis            | 8   | 474 | 32   | 8049 | 0.002154 |
| amino acid activation                           | 9   | 474 | 42   | 8049 | 0.00269  |
| tRNA aminoacylation for protein translation     | 9   | 474 | 42   | 8049 | 0.00269  |
| tRNA aminoacylation                             | 9   | 474 | 42   | 8049 | 0.00269  |
| RNA modification                                | 10  | 474 | 52   | 8049 | 0.002961 |
| purine nucleotide metabolism                    | 10  | 474 | 52   | 8049 | 0.002961 |
| regulation of translation                       | 10  | 474 | 53   | 8049 | 0.003386 |
| ribonucleotide metabolism                       | 10  | 474 | 53   | 8049 | 0.003386 |
| hydrogen transport                              | 10  | 474 | 53   | 8049 | 0.003386 |
| coenzyme metabolism                             | 11  | 474 | 63   | 8049 | 0.003424 |
| carbohydrate catabolism                         | 11  | 474 | 63   | 8049 | 0.003424 |
| purine ribonucleotide biosynthesis              | 9   | 474 | 44   | 8049 | 0.003644 |
| tRNA modification                               | 9   | 474 | 45   | 8049 | 0.00421  |
| obsolete biological process                     | 34  | 474 | 349  | 8049 | 0.004374 |
| organelle organization and biogenesis           | 26  | 474 | 246  | 8049 | 0.00506  |
| purine nucleotide biosynthesis                  | 9   | 474 | 48   | 8049 | 0.006318 |
| ribonucleotide biosynthesis                     | 9   | 474 | 49   | 8049 | 0.007174 |
| protein transport                               | 30  | 474 | 307  | 8049 | 0.007425 |

|                                                         |    |     |     |      |          |
|---------------------------------------------------------|----|-----|-----|------|----------|
| cytoskeleton organization and biogenesis                | 21 | 474 | 191 | 8049 | 0.008387 |
| intracellular protein transport                         | 28 | 474 | 291 | 8049 | 0.012018 |
| antigen presentation\, endogenous antigen               | 4  | 474 | 9   | 8049 | 0.012978 |
| oxidative phosphorylation                               | 6  | 474 | 25  | 8049 | 0.013698 |
| RNA metabolism                                          | 26 | 474 | 269 | 8049 | 0.015022 |
| hexose metabolism                                       | 12 | 474 | 90  | 8049 | 0.015918 |
| coenzyme biosynthesis                                   | 7  | 474 | 36  | 8049 | 0.017256 |
| antigen processing\, endogenous antigen via MHC class I | 4  | 474 | 10  | 8049 | 0.017742 |
| nucleotide biosynthesis                                 | 11 | 474 | 80  | 8049 | 0.018181 |
| monosaccharide metabolism                               | 12 | 474 | 92  | 8049 | 0.018526 |
| tRNA metabolism                                         | 9  | 474 | 58  | 8049 | 0.019266 |
| muscle development                                      | 14 | 474 | 120 | 8049 | 0.023503 |
| protein targeting                                       | 14 | 474 | 121 | 8049 | 0.02498  |
| transition metal ion homeostasis                        | 5  | 474 | 20  | 8049 | 0.026909 |
| NADPH regeneration                                      | 3  | 474 | 5   | 8049 | 0.030604 |
| pentose-phosphate shunt                                 | 3  | 474 | 5   | 8049 | 0.030604 |
| intracellular transport                                 | 32 | 474 | 375 | 8049 | 0.033078 |
| RNA processing                                          | 23 | 474 | 248 | 8049 | 0.034371 |
| cell growth                                             | 11 | 474 | 90  | 8049 | 0.037695 |
| nucleotide metabolism                                   | 12 | 474 | 105 | 8049 | 0.043694 |
| NADPH metabolism                                        | 3  | 474 | 6   | 8049 | 0.044142 |
| peroxidase reaction                                     | 3  | 474 | 6   | 8049 | 0.044142 |
| coenzyme and prosthetic group metabolism                | 11 | 474 | 93  | 8049 | 0.045637 |
| translational initiation                                | 7  | 474 | 45  | 8049 | 0.046452 |

**Table S4.** In this experiment 3 stages of renal cancer metastasis were examined: normal, cancer, metastasis. Therefore 3 transcription patterns were identified ( $\alpha = 0, 1, 2$ ).  $G_0$  defines the steady state network,  $G_1$ ,  $G_2$  the patterns participating in the process of carcinogenesis. The scalar products  $\sum_i G_{\alpha i} G_{\beta i}$ ,  $\alpha = 0, 1, 2$ , between all the gene transcription patterns of the different patients were calculated.

|             |                                 |                |                |          |
|-------------|---------------------------------|----------------|----------------|----------|
| patient1,2  |                                 | p2             |                |          |
|             | $G_{\alpha p1} * G_{\alpha p2}$ | $G_0$          | $G_1$          | $G_2$    |
| p1          | $G_0$                           | <b>0.98</b>    | 0.023          | 0.00078  |
|             | $G_1$                           | 0.02069        | <b>0.43</b>    | 0.0114   |
|             | $G_2$                           | 0.00677        | -0.0377        | 0.026    |
|             |                                 |                |                |          |
| patient1,3  | $G_{\alpha p1} * G_{\alpha p3}$ | p3             |                |          |
|             |                                 | $G_0$          | $G_1$          | $G_2$    |
| p1          | $G_0$                           | <b>0.9775</b>  | -0.03119       | -0.01019 |
|             | $G_1$                           | 0.030488       | <b>0.33271</b> | -0.09    |
|             | $G_2$                           | 0.000696       | -0.01416       | 0.036051 |
|             |                                 |                |                |          |
| patient 2,3 | $G_{\alpha p2} * G_{\alpha p3}$ | p3             |                |          |
|             |                                 | $G_0$          | $G_1$          | $G_2$    |
| p2          | $G_0$                           | <b>0.98319</b> | -0.0051        | 0.024139 |
|             | $G_1$                           | 0.035324       | <b>0.38843</b> | -0.10307 |
|             | $G_2$                           | 0.000386       | -0.10678       | 0.034421 |

**Table S4.A.** In this experiment 3 stages of renal cancer metastasis were examined: normal, cancer, metastasis.  $G_1$  is the major pattern participating in the process of carcinogenesis. Examples of  $G_{i1}$  values of the key signaling proteins, that belong to ~10% group of the most contributing, positively or negatively, proteins (have  $G_{i1}$  values less than -0.007 or more than 0.007) at least in one patient, are reported.

|         | $G_1^{p1}$ | $G_1^{p2}$ | $G_1^{p3}$ |
|---------|------------|------------|------------|
| IGF1R   | -0.002645  | 0.009486   | 0.00347    |
| MAP2K7  | 0.002062   | 0.000639   | 0.011014   |
| VEGFA   | -0.009015  | -0.007553  | -0.004801  |
| EGFR    | -0.00406   | -0.011398  | -0.004444  |
| PTEN    | 0.001558   | 0.007931   | -0.000898  |
| MAPK4   | 0.008391   | 0.003592   | -0.001819  |
| MAPK7   | 0.008151   | -0.004993  | 0.00112    |
| MAP2K7  | 0.002062   | 0.000639   | 0.011014   |
| p38     | 0.000311   | -0.003271  | -0.007145  |
| SRC     | -0.009448  | -0.000169  | -0.000118  |
| PDGFRA  | 0.010455   | -0.000369  | 0.009453   |
| NFKBIL2 | 0.001801   | -0.0028    | 0.011662   |

**Table S5.** Three stages of colon cancer metastasis were examined: normal, cancer, metastasis. 3 transcription patterns were identified

|           |                     | <b>p2</b>       |                     |                 |
|-----------|---------------------|-----------------|---------------------|-----------------|
| <b>p1</b> | $G_{ap1} * G_{ap2}$ | $G_0$           | $G_1$               | $G_2$           |
|           | $G_0$               | <b>0.995157</b> | -<br>0.01612        | -0.02213        |
|           | $G_1$               | 0.024807        | -<br><b>0.25364</b> | 0.168879        |
|           | $G_2$               | -0.0317         | -<br>0.26787        | <b>-0.26091</b> |

**Table S5.A.** Three stages of colon cancer metastasis were examined: normal, cancer, metastasis. Examples of  $G_{i1}$  values of the key signaling proteins, that belong to ~10% group of the most contributing, positively or negatively, proteins (have  $G_{i1}$  values less than -0.007 or more than 0.007) at least in one patient, are reported.

|        | $G_1^{p1}$ | $G_1^{p2}$ |
|--------|------------|------------|
| EGFR   | -0.010989  | -0.000497  |
| EGFR   | -0.008582  | 0.000998   |
| MYC    | -0.012846  | 0.008705   |
| SMAD4  | -0.015359  | -0.002272  |
| FOSB   | 0.002696   | -0.017099  |
| VEGFA  | -0.012441  | 0.019198   |
| MAPK3  | 0.008063   | -0.005984  |
| PDGFRA | -0.003558  | -0.013948  |
| PTEN   | -0.000152  | -0.00764   |
| CASP6  | 0.009655   | 0.000439   |
| IGF2R  | -0.007799  | 0.003066   |
| p38    | -0.003906  | 0.006829   |

**Table S6.** Three stages of disease of prostate cancer metastasis were examined: basal, luminal, cancer. 3 transcription patterns were identified ( $\alpha=0,1,2$ ). The scalar product  $\sum_i G_{i\alpha} G_{i\alpha}$ ,  $\alpha=0,1,2$ , between all the gene transcription patterns of the different patients were calculated.

| $G_{api} * G_{apj}$ | $G_{0 p1}$ | $G_{1 p1}$ | $G_{2 p1}$ | $G_{0 p2}$ | $G_{1 p2}$ | $G_{2 p2}$ | $G_{0 p3}$ | $G_{1 p3}$ | $G_{2 p3}$ | $G_{0 p4}$ | $G_{1 p4}$ | $G_{2 p4}$ |
|---------------------|------------|------------|------------|------------|------------|------------|------------|------------|------------|------------|------------|------------|
| $G_{0 p1}$          | 1.0        | 1.3E-07    | 1.0E-08    | 1.0E+00    | -1.3E-02   | 2.0E-02    | 1.0E+00    | 2.6E-03    | 2.5E-02    | 1.0E+00    | -6.0E-02   | -4.1E-03   |
| $G_{1 p1}$          | 1.3E-07    | 1.0        | 6.9E-08    | 1.8E-02    | 3.7E-01    | 2.3E-02    | 1.1E-02    | 3.6E-01    | -7.2E-02   | -2.8E-02   | 1.5E-01    | -5.0E-01   |
| $G_{2 p1}$          | 1.0E-08    | 6.9E-08    | 1.0        | 6.4E-04    | 1.7E-01    | 4.4E-02    | 6.6E-03    | 2.1E-01    | -2.4E-02   | -1.2E-02   | 7.1E-02    | 8.6E-01    |
| $G_{0 p2}$          | 1.0E+00    | 1.8E-02    | 6.4E-04    | 1.0        | -6.9E-08   | 1.0E-07    | 1.0E+00    | 5.3E-03    | 1.7E-02    | 1.0E+00    | -3.8E-02   | -1.2E-02   |
| $G_{1 p2}$          | -1.3E-02   | 3.7E-01    | 1.7E-01    | -6.9E-08   | 1.0        | 1.6E-07    | 5.0E-03    | 3.7E-01    | -3.2E-01   | -1.2E-02   | 2.7E-01    | -3.9E-02   |
| $G_{2 p2}$          | 2.0E-02    | 2.3E-02    | 4.4E-02    | 1.0E-07    | 1.6E-07    | 1.0        | 1.6E-02    | 4.6E-02    | 3.1E-02    | 6.9E-03    | -1.8E-01   | 2.3E-02    |
| $G_{0 p3}$          | 1.0E+00    | 1.1E-02    | 6.6E-03    | 1.0E+00    | 5.0E-03    | 1.6E-02    | 1.0        | -1.1E-07   | 9.0E-10    | 1.0E+00    | -3.1E-02   | -3.5E-03   |
| $G_{1 p3}$          | 2.6E-03    | 3.6E-01    | 2.1E-01    | 5.3E-03    | 3.7E-01    | 4.6E-02    | -1.1E-07   | 1.0        | 8.7E-08    | -1.6E-02   | -1.8E-02   | 2.9E-03    |
| $G_{2 p3}$          | 2.5E-02    | -7.2E-02   | -2.4E-02   | 1.7E-02    | -3.2E-01   | 3.1E-02    | 9.0E-10    | 8.7E-08    | 1.0        | 1.7E-02    | -1.7E-01   | 1.3E-02    |
| $G_{0 p4}$          | 1.0E+00    | -2.8E-02   | -1.2E-02   | 1.0E+00    | -1.2E-02   | 6.9E-03    | 1.0E+00    | -1.6E-02   | 1.7E-02    | 1.0        | -1.1E-08   | -6.8E-08   |
| $G_{1 p4}$          | -6.0E-02   | 1.5E-01    | 7.1E-02    | -3.8E-02   | 2.7E-01    | -1.8E-01   | -3.1E-02   | -1.8E-02   | -1.7E-01   | -1.1E-08   | 1.0        | 2.2E-07    |
| $G_{2 p4}$          | -4.1E-03   | -5.0E-01   | 8.6E-01    | -1.2E-02   | -3.9E-02   | 2.3E-02    | -3.5E-03   | 2.9E-03    | 1.3E-02    | -6.8E-08   | 2.2E-07    | 1.0        |



**Table S7.** Over-represented biological processes within the transcripts with the lowest  $G_{i0}$  in the HF1 cells as identified by EASE software (5). Biological categories that are significantly over-represented (EASE score < 0.05) among the 388 probes with the lowest  $G_{i0}$  values.

| Gene Category                             | List Hits | List Total | Population | Population | EASE score |
|-------------------------------------------|-----------|------------|------------|------------|------------|
| protein biosynthesis                      | 90        | 227        | 539        | 10937      | 3.10E-58   |
| macromolecule biosynthesis                | 94        | 227        | 847        | 10937      | 4.43E-45   |
| biosynthesis                              | 95        | 227        | 1014       | 10937      | 2.93E-39   |
| protein metabolism                        | 108       | 227        | 2217       | 10937      | 2.62E-20   |
| ribosome biogenesis                       | 14        | 227        | 59         | 10937      | 1.55E-10   |
| ribosome biogenesis and assembly          | 14        | 227        | 61         | 10937      | 2.42E-10   |
| translation                               | 20        | 227        | 195        | 10937      | 1.98E-08   |
| translational elongation                  | 8         | 227        | 22         | 10937      | 1.92E-07   |
| metabolism                                | 161       | 227        | 6063       | 10937      | 1.22E-06   |
| cytoplasm organization and biogenesis     | 26        | 227        | 424        | 10937      | 2.20E-06   |
| regulation of translational initiation    | 8         | 227        | 33         | 10937      | 3.96E-06   |
| cell organization and biogenesis          | 32        | 227        | 635        | 10937      | 6.65E-06   |
| translational initiation                  | 9         | 227        | 56         | 10937      | 1.78E-05   |
| physiological process                     | 208       | 227        | 8954       | 10937      | 2.42E-05   |
| regulation of translation                 | 9         | 227        | 66         | 10937      | 6.01E-05   |
| energy pathways                           | 14        | 227        | 205        | 10937      | 0.00033    |
| transition metal ion homeostasis          | 5         | 227        | 22         | 10937      | 0.000969   |
| ectoderm development                      | 8         | 227        | 80         | 10937      | 0.001295   |
| glycolysis                                | 6         | 227        | 44         | 10937      | 0.00203    |
| glucose catabolism                        | 6         | 227        | 53         | 10937      | 0.004618   |
| energy derivation by oxidation of organic | 9         | 227        | 130        | 10937      | 0.005512   |
| alcohol catabolism                        | 6         | 227        | 60         | 10937      | 0.007825   |
| monosaccharide catabolism                 | 6         | 227        | 60         | 10937      | 0.007825   |
| hexose catabolism                         | 6         | 227        | 60         | 10937      | 0.007825   |
| proton transport                          | 6         | 227        | 61         | 10937      | 0.008384   |
| copper ion homeostasis                    | 3         | 227        | 8          | 10937      | 0.010965   |
| histogenesis                              | 8         | 227        | 120        | 10937      | 0.012157   |
| cell growth and/or maintenance            | 88        | 227        | 3436       | 10937      | 0.013402   |
| epidermal differentiation                 | 6         | 227        | 69         | 10937      | 0.013879   |
| ATP biosynthesis                          | 4         | 227        | 25         | 10937      | 0.01432    |
| nucleoside phosphate metabolism           | 4         | 227        | 25         | 10937      | 0.01432    |
| hydrogen transport                        | 6         | 227        | 70         | 10937      | 0.014702   |
| di-, tri-valent inorganic cation homeost  | 5         | 227        | 51         | 10937      | 0.020798   |
| carbohydrate catabolism                   | 6         | 227        | 77         | 10937      | 0.021393   |
| ATP metabolism                            | 4         | 227        | 29         | 10937      | 0.021422   |
| glucose metabolism                        | 6         | 227        | 78         | 10937      | 0.022487   |
| main pathways of carbohydrate metabo      | 6         | 227        | 83         | 10937      | 0.028496   |
| protein folding                           | 7         | 227        | 113        | 10937      | 0.029596   |
| metal ion homeostasis                     | 5         | 227        | 57         | 10937      | 0.029897   |
| cytoskeleton organization and biogenesis  | 12        | 227        | 284        | 10937      | 0.033825   |
| purine ribonucleoside triphosphate bios   | 4         | 227        | 36         | 10937      | 0.037698   |
| ribonucleoside triphosphate biosynthes    | 4         | 227        | 36         | 10937      | 0.037698   |
| nucleobase\, nucleoside\, nucleotide ar   | 4         | 227        | 36         | 10937      | 0.037698   |
| purine nucleoside triphosphate biosynt    | 4         | 227        | 36         | 10937      | 0.037698   |
| group transfer coenzyme metabolism        | 4         | 227        | 37         | 10937      | 0.040418   |
| nucleoside triphosphate biosynthesis      | 4         | 227        | 37         | 10937      | 0.040418   |
| binding to mRNA cap                       | 2         | 227        | 2          | 10937      | 0.040902   |
| purine ribonucleoside triphosphate met    | 4         | 227        | 40         | 10937      | 0.049154   |
| ribonucleoside triphosphate metabolisr    | 4         | 227        | 40         | 10937      | 0.049154   |
| purine nucleoside triphosphate metabo     | 4         | 227        | 40         | 10937      | 0.049154   |

**Table S8.** Over-represented biological processes within the transcripts with the mid  $G_{i0}$  in the HF1 cells as identified by EASE software. Biological categories that are significantly over-represented (first 65 categories) among the 9900 probes with the mid  $G_{i0}$  values.

| Gene Category                             | List Hits | List Total | Population | Population | EASE score |
|-------------------------------------------|-----------|------------|------------|------------|------------|
| metabolism                                | 3534      | 5765       | 6063       | 10937      | 5.81E-39   |
| nucleobase\, nucleoside\, nucleotide      | 1642      | 5765       | 2673       | 10937      | 1.65E-25   |
| cell cycle                                | 479       | 5765       | 690        | 10937      | 4.47E-20   |
| DNA metabolism                            | 354       | 5765       | 517        | 10937      | 1.25E-13   |
| intracellular transport                   | 349       | 5765       | 512        | 10937      | 4.93E-13   |
| mitotic cell cycle                        | 235       | 5765       | 329        | 10937      | 3.41E-12   |
| transcription                             | 1088      | 5765       | 1818       | 10937      | 1.71E-11   |
| response to DNA damage stimulus           | 159       | 5765       | 211        | 10937      | 1.93E-11   |
| cell proliferation                        | 646       | 5765       | 1036       | 10937      | 4.58E-11   |
| protein modification                      | 597       | 5765       | 951        | 10937      | 5.59E-11   |
| response to endogenous stimulus           | 159       | 5765       | 213        | 10937      | 6.82E-11   |
| regulation of cell cycle                  | 264       | 5765       | 384        | 10937      | 1.13E-10   |
| transcription\, DNA-dependent             | 1048      | 5765       | 1756       | 10937      | 1.18E-10   |
| protein metabolism                        | 1302      | 5765       | 2217       | 10937      | 1.40E-10   |
| RNA metabolism                            | 264       | 5765       | 390        | 10937      | 1.30E-09   |
| intracellular protein transport           | 255       | 5765       | 375        | 10937      | 1.31E-09   |
| regulation of transcription               | 1011      | 5765       | 1704       | 10937      | 1.77E-09   |
| RNA processing                            | 247       | 5765       | 363        | 10937      | 2.22E-09   |
| protein transport                         | 268       | 5765       | 400        | 10937      | 4.57E-09   |
| regulation of transcription\, DNA-depe    | 991       | 5765       | 1677       | 10937      | 8.78E-09   |
| DNA replication and chromosome cy         | 136       | 5765       | 186        | 10937      | 1.76E-08   |
| DNA repair                                | 132       | 5765       | 180        | 10937      | 2.18E-08   |
| chromatin modification                    | 55        | 5765       | 64         | 10937      | 9.34E-08   |
| Golgi vesicle transport                   | 51        | 5765       | 59         | 10937      | 2.13E-07   |
| physiological process                     | 4821      | 5765       | 8954       | 10937      | 2.92E-07   |
| S phase of mitotic cell cycle             | 108       | 5765       | 147        | 10937      | 4.17E-07   |
| nucleocytoplasmic transport               | 76        | 5765       | 97         | 10937      | 4.36E-07   |
| DNA replication                           | 107       | 5765       | 146        | 10937      | 5.82E-07   |
| nuclear division                          | 106       | 5765       | 151        | 10937      | 1.66E-05   |
| M phase                                   | 109       | 5765       | 157        | 10937      | 2.67E-05   |
| negative regulation of cell cycle         | 56        | 5765       | 72         | 10937      | 2.84E-05   |
| non-covalent chromatin modification       | 29        | 5765       | 32         | 10937      | 3.35E-05   |
| chromatin remodeling                      | 29        | 5765       | 32         | 10937      | 3.35E-05   |
| negative regulation of transcription      | 74        | 5765       | 101        | 10937      | 4.22E-05   |
| vesicle-mediated transport                | 195       | 5765       | 304        | 10937      | 4.67E-05   |
| mitosis                                   | 86        | 5765       | 121        | 10937      | 5.78E-05   |
| M phase of mitotic cell cycle             | 87        | 5765       | 123        | 10937      | 6.89E-05   |
| protein-nucleus import                    | 48        | 5765       | 61         | 10937      | 7.43E-05   |
| regulation of gene expression\, epigen    | 48        | 5765       | 61         | 10937      | 7.43E-05   |
| nuclear organization and biogenesis       | 127       | 5765       | 190        | 10937      | 8.62E-05   |
| chromosome organization and biogen        | 124       | 5765       | 185        | 10937      | 8.77E-05   |
| protein amino acid phosphorylation        | 293       | 5765       | 478        | 10937      | 9.72E-05   |
| transcription from Pol II promoter        | 279       | 5765       | 454        | 10937      | 0.000113   |
| regulation of transcription from Pol II p | 154       | 5765       | 238        | 10937      | 0.000171   |
| rRNA processing                           | 29        | 5765       | 34         | 10937      | 0.000308   |
| phosphorus metabolism                     | 392       | 5765       | 662        | 10937      | 0.0004     |
| phosphate metabolism                      | 392       | 5765       | 662        | 10937      | 0.0004     |
| cell organization and biogenesis          | 376       | 5765       | 635        | 10937      | 0.000532   |
| coenzyme and prosthetic group biosy       | 64        | 5765       | 90         | 10937      | 0.000595   |
| protein targeting                         | 100       | 5765       | 150        | 10937      | 0.000613   |
| ubiquitin-dependent protein catabolism    | 71        | 5765       | 102        | 10937      | 0.000745   |
| rRNA metabolism                           | 31        | 5765       | 38         | 10937      | 0.000747   |
| tRNA metabolism                           | 77        | 5765       | 112        | 10937      | 0.000761   |
| cell cycle checkpoint                     | 29        | 5765       | 35         | 10937      | 0.000764   |
| transcription initiation                  | 34        | 5765       | 43         | 10937      | 0.00101    |
| DNA dependent DNA replication             | 54        | 5765       | 75         | 10937      | 0.001119   |
| modification-dependent protein catab      | 71        | 5765       | 103        | 10937      | 0.001134   |
| RNA splicing                              | 74        | 5765       | 108        | 10937      | 0.001137   |
| phospholipid biosynthesis                 | 28        | 5765       | 34         | 10937      | 0.001175   |
| ER to Golgi transport                     | 24        | 5765       | 28         | 10937      | 0.001176   |
| coenzyme and prosthetic group meta        | 86        | 5765       | 129        | 10937      | 0.001556   |
| establishment and/or maintenance of       | 103       | 5765       | 158        | 10937      | 0.001595   |
| intracellular receptor-mediated signal    | 19        | 5765       | 21         | 10937      | 0.001643   |
| cell growth and/or maintenance            | 1883      | 5765       | 3436       | 10937      | 0.001767   |

**Table S9.** Over-represented biological processes within the transcripts with the highest  $G_{i0}$  in the HF1 cells as identified by EASE software . Biological categories that are significantly over-represented (EASE score < 0.01) among the 410 probes with the highest  $G_{i0}$  values.

| Gene Category                                | List Hits | List Total | Population | Population | EASE sco |
|----------------------------------------------|-----------|------------|------------|------------|----------|
| cell-cell signaling                          | 43        | 327        | 525        | 10937      | 4.14E-09 |
| response to external stimulus                | 69        | 327        | 1263       | 10937      | 6.84E-07 |
| cell communication                           | 120       | 327        | 2791       | 10937      | 5.52E-06 |
| neurogenesis                                 | 29        | 327        | 404        | 10937      | 2.84E-05 |
| G-protein coupled receptor protein signaling | 36        | 327        | 566        | 10937      | 3.21E-05 |
| defense response                             | 43        | 327        | 756        | 10937      | 6.32E-05 |
| transmission of nerve impulse                | 20        | 327        | 240        | 10937      | 0.000102 |
| immune response                              | 39        | 327        | 682        | 10937      | 0.000137 |
| development                                  | 76        | 327        | 1683       | 10937      | 0.000155 |
| perception of external stimulus              | 23        | 327        | 315        | 10937      | 0.000186 |
| response to biotic stimulus                  | 44        | 327        | 821        | 10937      | 0.000195 |
| synaptic transmission                        | 19        | 327        | 232        | 10937      | 0.000199 |
| organogenesis                                | 46        | 327        | 901        | 10937      | 0.000394 |
| morphogenesis                                | 50        | 327        | 1010       | 10937      | 0.000417 |
| cell surface receptor linked signal transduc | 48        | 327        | 991        | 10937      | 0.000903 |
| sensory perception                           | 20        | 327        | 291        | 10937      | 0.001142 |
| metal ion transport                          | 19        | 327        | 283        | 10937      | 0.002045 |
| homophilic cell adhesion                     | 9         | 327        | 81         | 10937      | 0.002776 |
| perception of abiotic stimulus               | 18        | 327        | 282        | 10937      | 0.004654 |
| cyclic-nucleotide-mediated signaling         | 10        | 327        | 109        | 10937      | 0.005202 |
| behavior                                     | 9         | 327        | 93         | 10937      | 0.00647  |
| response to pest/pathogen/parasite           | 24        | 327        | 444        | 10937      | 0.007087 |
| signal transduction                          | 84        | 327        | 2196       | 10937      | 0.009705 |

**Table S10.** Over-represented biological processes within the transcripts with the lowest  $G_{i0}$  in the dendritic cells as identified by EASE software . Biological categories that were significantly over-represented (first 65 categories EASE score < 0.05) among the 1200 probes with the lowest  $G_{i0}$ .

| Gene Category                                   | List Hits | List Total | Population | Population | EASE score |
|-------------------------------------------------|-----------|------------|------------|------------|------------|
| protein biosynthesis                            | 131       | 1009       | 385        | 8120       | 2.79E-29   |
| macromolecule biosynthesis                      | 174       | 1009       | 630        | 8120       | 1.13E-26   |
| biosynthesis                                    | 187       | 1009       | 756        | 8120       | 1.75E-22   |
| protein metabolism                              | 298       | 1009       | 1712       | 8120       | 1.08E-11   |
| translation                                     | 47        | 1009       | 141        | 8120       | 2.08E-10   |
| antigen processing                              | 16        | 1009       | 22         | 8120       | 1.70E-09   |
| nucleoside triphosphate metabolism              | 20        | 1009       | 37         | 8120       | 1.01E-08   |
| proton transport                                | 24        | 1009       | 53         | 8120       | 1.76E-08   |
| antigen presentation                            | 15        | 1009       | 22         | 8120       | 2.31E-08   |
| ribonucleoside triphosphate metabolism          | 19        | 1009       | 35         | 8120       | 2.41E-08   |
| purine ribonucleoside triphosphate metabolism   | 19        | 1009       | 35         | 8120       | 2.41E-08   |
| purine nucleoside triphosphate metabolism       | 19        | 1009       | 35         | 8120       | 2.41E-08   |
| purine nucleoside triphosphate biosynthesis     | 18        | 1009       | 32         | 8120       | 3.16E-08   |
| purine ribonucleoside triphosphate biosynthesis | 18        | 1009       | 32         | 8120       | 3.16E-08   |
| ribonucleoside triphosphate biosynthesis        | 18        | 1009       | 32         | 8120       | 3.16E-08   |
| ATP metabolism                                  | 16        | 1009       | 26         | 8120       | 4.73E-08   |
| nucleoside phosphate metabolism                 | 15        | 1009       | 23         | 8120       | 5.23E-08   |
| ATP biosynthesis                                | 15        | 1009       | 23         | 8120       | 5.23E-08   |
| nucleoside triphosphate biosynthesis            | 18        | 1009       | 33         | 8120       | 5.77E-08   |
| physiological process                           | 898       | 1009       | 6770       | 8120       | 5.97E-08   |
| group transfer coenzyme metabolism              | 17        | 1009       | 30         | 8120       | 7.54E-08   |
| response to biotic stimulus                     | 135       | 1009       | 708        | 8120       | 1.28E-07   |
| purine ribonucleotide metabolism                | 21        | 1009       | 47         | 8120       | 2.25E-07   |
| hydrogen transport                              | 24        | 1009       | 60         | 8120       | 2.79E-07   |
| purine ribonucleotide biosynthesis              | 20        | 1009       | 44         | 8120       | 3.42E-07   |
| purine nucleotide metabolism                    | 22        | 1009       | 53         | 8120       | 4.80E-07   |
| metabolism                                      | 642       | 1009       | 4602       | 8120       | 1.11E-06   |
| ribonucleotide metabolism                       | 21        | 1009       | 52         | 8120       | 1.57E-06   |
| ribonucleotide biosynthesis                     | 20        | 1009       | 48         | 8120       | 1.72E-06   |
| purine nucleotide biosynthesis                  | 20        | 1009       | 48         | 8120       | 1.72E-06   |
| energy pathways                                 | 47        | 1009       | 184        | 8120       | 1.73E-06   |
| response to pest/pathogen/parasite              | 80        | 1009       | 383        | 8120       | 2.23E-06   |
| immune response                                 | 113       | 1009       | 596        | 8120       | 2.24E-06   |
| translational initiation                        | 19        | 1009       | 45         | 8120       | 2.69E-06   |
| regulation of translation                       | 21        | 1009       | 54         | 8120       | 3.14E-06   |
| coenzyme biosynthesis                           | 18        | 1009       | 42         | 8120       | 4.20E-06   |
| oxidative phosphorylation                       | 13        | 1009       | 23         | 8120       | 4.57E-06   |
| regulation of translational initiation          | 14        | 1009       | 27         | 8120       | 5.76E-06   |
| antigen presentation, exogenous antigen         | 9         | 1009       | 11         | 8120       | 6.41E-06   |
| antigen processing, exogenous antigen via l     | 9         | 1009       | 11         | 8120       | 6.41E-06   |
| defense response                                | 120       | 1009       | 656        | 8120       | 6.43E-06   |
| RNA metabolism                                  | 63        | 1009       | 289        | 8120       | 7.78E-06   |
| RNA processing                                  | 59        | 1009       | 267        | 8120       | 1.03E-05   |
| coenzyme metabolism                             | 23        | 1009       | 68         | 8120       | 1.31E-05   |
| translational elongation                        | 10        | 1009       | 15         | 8120       | 1.68E-05   |
| energy derivation by oxidation of organic com   | 32        | 1009       | 119        | 8120       | 3.56E-05   |
| main pathways of carbohydrate metabolism        | 23        | 1009       | 73         | 8120       | 4.55E-05   |
| nucleotide metabolism                           | 29        | 1009       | 107        | 8120       | 7.70E-05   |
| ribosome biogenesis                             | 16        | 1009       | 44         | 8120       | 0.00016    |
| ribosome biogenesis and assembly                | 16        | 1009       | 45         | 8120       | 0.000213   |
| aerobic respiration                             | 7         | 1009       | 9          | 8120       | 0.000217   |
| cellular respiration                            | 7         | 1009       | 9          | 8120       | 0.000217   |
| RNA splicing                                    | 26        | 1009       | 99         | 8120       | 0.000334   |
| intracellular transport                         | 72        | 1009       | 388        | 8120       | 0.000397   |
| protein transport                               | 60        | 1009       | 309        | 8120       | 0.000401   |
| nucleotide biosynthesis                         | 23        | 1009       | 84         | 8120       | 0.000434   |
| intracellular protein transport                 | 57        | 1009       | 291        | 8120       | 0.000457   |
| response to external stimulus                   | 163       | 1009       | 1030       | 8120       | 0.000462   |
| ATP synthesis coupled electron transport (s     | 9         | 1009       | 17         | 8120       | 0.000474   |
| ATP synthesis coupled electron transport        | 9         | 1009       | 17         | 8120       | 0.000474   |
| carbohydrate catabolism                         | 19        | 1009       | 64         | 8120       | 0.000562   |
| protein-disulfide reduction                     | 9         | 1009       | 18         | 8120       | 0.000761   |
| response to stress                              | 111       | 1009       | 667        | 8120       | 0.000778   |
| mRNA metabolism                                 | 31        | 1009       | 134        | 8120       | 0.000826   |

**Table S11.** Over-represented biological processes within the transcripts with the lowest  $G_{i0}$  in the hematopoietic cells as identified by EASE software. Biological categories that are significantly over-represented (first 65 categories EASE score < 0.05) among the 1180 probes with the lowest  $G_{i0}$ .

| Gene Category                                       | List Hits | List Total | Population | Population | EASE score |
|-----------------------------------------------------|-----------|------------|------------|------------|------------|
| protein biosynthesis                                | 142       | 971        | 385        | 8120       | 3.29E-38   |
| m acrom olecule biosynthesis                        | 190       | 971        | 630        | 8120       | 2.39E-37   |
| biosynthesis                                        | 207       | 971        | 756        | 8120       | 4.37E-34   |
| m etabolism                                         | 684       | 971        | 4602       | 8120       | 5.60E-21   |
| translation                                         | 56        | 971        | 141        | 8120       | 1.03E-16   |
| protein m etabolism                                 | 301       | 971        | 1712       | 8120       | 9.52E-15   |
| RNA processing                                      | 77        | 971        | 267        | 8120       | 9.34E-14   |
| RNA m etabolism                                     | 80        | 971        | 289        | 8120       | 3.19E-13   |
| physiological process                               | 874       | 971        | 6770       | 8120       | 3.12E-10   |
| translational initiation                            | 23        | 971        | 45         | 8120       | 1.09E-09   |
| purine nucleotide m etabolism                       | 25        | 971        | 53         | 8120       | 1.38E-09   |
| purine nucleotide biosynthesis                      | 23        | 971        | 48         | 8120       | 5.08E-09   |
| regulation of translational initiation              | 17        | 971        | 27         | 8120       | 5.53E-09   |
| regulation of translation                           | 24        | 971        | 54         | 8120       | 1.30E-08   |
| oxidative phosphorylation                           | 15        | 971        | 23         | 8120       | 3.18E-08   |
| nucleoside triphosphate m etabolism                 | 19        | 971        | 37         | 8120       | 4.03E-08   |
| group transfer coenzym e m etabolism                | 17        | 971        | 30         | 8120       | 4.35E-08   |
| purine nucleoside triphosphate m etabolism          | 18        | 971        | 35         | 8120       | 9.94E-08   |
| purine ribonucleoside triphosphate m etabolism      | 18        | 971        | 35         | 8120       | 9.94E-08   |
| ribonucleoside triphosphate m etabolism             | 18        | 971        | 35         | 8120       | 9.94E-08   |
| purine ribonucleotide m etabolism                   | 21        | 971        | 47         | 8120       | 1.18E-07   |
| purine nucleoside triphosphate biosynthesis         | 17        | 971        | 32         | 8120       | 1.42E-07   |
| ribonucleoside triphosphate biosynthesis            | 17        | 971        | 32         | 8120       | 1.42E-07   |
| purine ribonucleoside triphosphate biosynthesis     | 17        | 971        | 32         | 8120       | 1.42E-07   |
| m RNA m etabolism                                   | 39        | 971        | 134        | 8120       | 1.84E-07   |
| purine ribonucleotide biosynthesis                  | 20        | 971        | 44         | 8120       | 1.85E-07   |
| RNA splicing                                        | 32        | 971        | 99         | 8120       | 2.24E-07   |
| nucleoside triphosphate biosynthesis                | 17        | 971        | 33         | 8120       | 2.46E-07   |
| ATP m etabolism                                     | 15        | 971        | 26         | 8120       | 2.65E-07   |
| nucleoside phosphate m etabolism                    | 14        | 971        | 23         | 8120       | 3.38E-07   |
| ATP biosynthesis                                    | 14        | 971        | 23         | 8120       | 3.38E-07   |
| energy pathways                                     | 47        | 971        | 184        | 8120       | 5.77E-07   |
| ribonucleotide m etabolism                          | 21        | 971        | 52         | 8120       | 8.48E-07   |
| ribonucleotide biosynthesis                         | 20        | 971        | 48         | 8120       | 9.49E-07   |
| translational elongation                            | 11        | 971        | 15         | 8120       | 9.66E-07   |
| proton transport                                    | 21        | 971        | 53         | 8120       | 1.21E-06   |
| m odification-dependent protein catabolism          | 27        | 971        | 81         | 8120       | 1.24E-06   |
| ubiquitin-dependent protein catabolism              | 27        | 971        | 81         | 8120       | 1.24E-06   |
| m RNA processing                                    | 34        | 971        | 120        | 8120       | 2.49E-06   |
| nucleotide biosynthesis                             | 27        | 971        | 84         | 8120       | 2.69E-06   |
| nucleotide m etabolism                              | 31        | 971        | 107        | 8120       | 4.62E-06   |
| ATP synthesis coupled electron transport            | 11        | 971        | 17         | 8120       | 4.99E-06   |
| ATP synthesis coupled electron transport (sensu     | 11        | 971        | 17         | 8120       | 4.99E-06   |
| ribosome biogenesis                                 | 18        | 971        | 44         | 8120       | 5.26E-06   |
| RNA splicing\, via transesterification reactions wi | 25        | 971        | 78         | 8120       | 7.26E-06   |
| nuclear m RNA splicing\, via spliceosome            | 25        | 971        | 78         | 8120       | 7.26E-06   |
| RNA splicing\, via transesterification reactions    | 25        | 971        | 78         | 8120       | 7.26E-06   |
| ribosome biogenesis and assembly                    | 18        | 971        | 45         | 8120       | 7.52E-06   |
| protein-disulfide reduction                         | 11        | 971        | 18         | 8120       | 1.00E-05   |
| hydrogen transport                                  | 21        | 971        | 60         | 8120       | 1.10E-05   |
| intracellular transport                             | 75        | 971        | 388        | 8120       | 2.14E-05   |
| main pathways of carbohydrate m etabolism           | 23        | 971        | 73         | 8120       | 2.50E-05   |
| coenzym e and prosthetic group biosynthesis         | 22        | 971        | 68         | 8120       | 2.52E-05   |
| coenzym e and prosthetic group m etabolism          | 27        | 971        | 96         | 8120       | 3.82E-05   |
| energy derivation by oxidation of organic compou    | 31        | 971        | 119        | 8120       | 4.45E-05   |
| RNA m odification                                   | 20        | 971        | 61         | 8120       | 5.33E-05   |
| coenzym e biosynthesis                              | 16        | 971        | 42         | 8120       | 5.58E-05   |
| tRNA m odification                                  | 19        | 971        | 57         | 8120       | 6.82E-05   |
| coenzym e m etabolism                               | 21        | 971        | 68         | 8120       | 8.47E-05   |
| protein folding                                     | 25        | 971        | 90         | 8120       | 9.82E-05   |
| m itochondrial electron transport\, NADH to ubiqu   | 9         | 971        | 15         | 8120       | 0.00012    |
| amino acid activation                               | 18        | 971        | 55         | 8120       | 0.000145   |
| tRNA am inoacylation                                | 18        | 971        | 55         | 8120       | 0.000145   |
| tRNA am inoacylation for protein translation        | 18        | 971        | 55         | 8120       | 0.000145   |

**Table S12.** Over-represented biological processes within the transcripts with the mid  $G_{i0}$  in the hematopoietic cells as identified by EASE software . The similar results were obtained in the dendritic cells. Biological categories that were significantly over-represented (first 65 categories EASE score < 0.05) among the 5150 probes with mid  $G_{i0}$ .

| Gene Category                              | List Hits | List Total | Population | Population | EASE score |
|--------------------------------------------|-----------|------------|------------|------------|------------|
| mitotic cell cycle                         | 214       | 3844       | 280        | 8120       | 1.69E-23   |
| cell cycle                                 | 395       | 3844       | 602        | 8120       | 1.11E-20   |
| DNA replication and chromosome cycl        | 130       | 3844       | 158        | 8120       | 2.61E-19   |
| metabolism                                 | 2375      | 3844       | 4602       | 8120       | 8.18E-19   |
| DNA metabolism                             | 274       | 3844       | 408        | 8120       | 2.25E-16   |
| DNA replication                            | 104       | 3844       | 125        | 8120       | 3.33E-16   |
| nucleobase\, nucleoside\, nucleotide ar    | 1121      | 3844       | 2033       | 8120       | 3.53E-16   |
| S phase of mitotic cell cycle              | 105       | 3844       | 127        | 8120       | 5.59E-16   |
| protein modification                       | 442       | 3844       | 758        | 8120       | 2.10E-10   |
| DNA repair                                 | 112       | 3844       | 156        | 8120       | 9.95E-10   |
| cell proliferation                         | 516       | 3844       | 909        | 8120       | 1.42E-09   |
| response to endogenous stimulus            | 126       | 3844       | 181        | 8120       | 1.90E-09   |
| response to DNA damage stimulus            | 126       | 3844       | 181        | 8120       | 1.90E-09   |
| DNA dependent DNA replication              | 57        | 3844       | 69         | 8120       | 6.50E-09   |
| M phase of mitotic cell cycle              | 78        | 3844       | 104        | 8120       | 2.26E-08   |
| mitosis                                    | 76        | 3844       | 102        | 8120       | 5.66E-08   |
| protein amino acid phosphorylation         | 242       | 3844       | 405        | 8120       | 3.06E-07   |
| physiological process                      | 3288      | 3844       | 6770       | 8120       | 4.03E-07   |
| M phase                                    | 91        | 3844       | 131        | 8120       | 5.13E-07   |
| nuclear division                           | 87        | 3844       | 125        | 8120       | 8.34E-07   |
| regulation of cell cycle                   | 212       | 3844       | 353        | 8120       | 1.08E-06   |
| RNA metabolism                             | 177       | 3844       | 289        | 8120       | 1.65E-06   |
| phosphorus metabolism                      | 320       | 3844       | 561        | 8120       | 1.72E-06   |
| phosphate metabolism                       | 320       | 3844       | 561        | 8120       | 1.72E-06   |
| phosphorylation                            | 258       | 3844       | 443        | 8120       | 2.28E-06   |
| mRNA metabolism                            | 90        | 3844       | 134        | 8120       | 5.48E-06   |
| mRNA processing                            | 82        | 3844       | 120        | 8120       | 5.60E-06   |
| RNA processing                             | 163       | 3844       | 267        | 8120       | 5.83E-06   |
| intracellular transport                    | 226       | 3844       | 388        | 8120       | 1.03E-05   |
| transcription                              | 724       | 3844       | 1379       | 8120       | 1.80E-05   |
| protein metabolism                         | 883       | 3844       | 1712       | 8120       | 5.22E-05   |
| transcription\, DNA-dependent              | 698       | 3844       | 1336       | 8120       | 5.99E-05   |
| RNA splicing                               | 67        | 3844       | 99         | 8120       | 7.38E-05   |
| regulation of transcription                | 681       | 3844       | 1304       | 8120       | 8.10E-05   |
| cell growth and/or maintenance             | 1360      | 3844       | 2706       | 8120       | 0.000122   |
| regulation of transcription\, DNA-depen    | 666       | 3844       | 1280       | 8120       | 0.000173   |
| nuclear mRNA splicing\, via spliceosom     | 54        | 3844       | 78         | 8120       | 0.000177   |
| RNA splicing\, via transesterification re  | 54        | 3844       | 78         | 8120       | 0.000177   |
| RNA splicing\, via transesterification re  | 54        | 3844       | 78         | 8120       | 0.000177   |
| protein transport                          | 178       | 3844       | 309        | 8120       | 0.000221   |
| intracellular protein transport            | 168       | 3844       | 291        | 8120       | 0.000291   |
| cytokinesis                                | 54        | 3844       | 79         | 8120       | 0.000292   |
| mRNA-nucleus export                        | 17        | 3844       | 18         | 8120       | 0.000295   |
| ubiquitin cycle                            | 43        | 3844       | 60         | 8120       | 0.000305   |
| chromosome organization and biogene        | 92        | 3844       | 148        | 8120       | 0.000333   |
| G2/M transition of mitotic cell cycle      | 29        | 3844       | 37         | 8120       | 0.000412   |
| regulation of CDK activity                 | 25        | 3844       | 31         | 8120       | 0.000607   |
| G1/S transition of mitotic cell cycle      | 35        | 3844       | 48         | 8120       | 0.000809   |
| chromatin modification                     | 35        | 3844       | 48         | 8120       | 0.000809   |
| nuclear organization and biogenesis        | 93        | 3844       | 153        | 8120       | 0.000897   |
| nucleocytoplasmic transport                | 52        | 3844       | 78         | 8120       | 0.000946   |
| transcription from Pol II promoter         | 221       | 3844       | 401        | 8120       | 0.001158   |
| maintenance of fidelity during DNA dep     | 20        | 3844       | 24         | 8120       | 0.001448   |
| mismatch repair                            | 20        | 3844       | 24         | 8120       | 0.001448   |
| establishment and/or maintenance of c      | 76        | 3844       | 123        | 8120       | 0.001504   |
| transcription initiation                   | 26        | 3844       | 34         | 8120       | 0.001717   |
| regulation of transcription from Pol II pr | 124       | 3844       | 215        | 8120       | 0.002045   |
| RNA localization                           | 19        | 3844       | 23         | 8120       | 0.002458   |
| nucleic acid transport                     | 19        | 3844       | 23         | 8120       | 0.002458   |
| regulation of mitosis                      | 19        | 3844       | 23         | 8120       | 0.002458   |
| RNA transport                              | 19        | 3844       | 23         | 8120       | 0.002458   |
| RNA-nucleus export                         | 19        | 3844       | 23         | 8120       | 0.002458   |
| nucleotide-excision repair                 | 17        | 3844       | 20         | 8120       | 0.002915   |
| DNA packaging                              | 80        | 3844       | 134        | 8120       | 0.004249   |

**Table S13.** Over-represented biological processes within the transcripts with the highest  $G_{oi}$  in the hematopoietic cells as identified by EASE software. Similar results were obtained in the dendritic cells. Biological categories that are significantly over-represented (EASE score < 0.05) among the 400 probes with the highest  $G_0$ .

| Gene Category                                            | List Hits | List Total | Population | Population | EASE score |
|----------------------------------------------------------|-----------|------------|------------|------------|------------|
| organogenesis                                            | 60        | 314        | 775        | 8120       | 1.88E-07   |
| morphogenesis                                            | 63        | 314        | 862        | 8120       | 6.52E-07   |
| development                                              | 85        | 314        | 1352       | 8120       | 2.38E-06   |
| cell surface receptor linked signal transduction         | 55        | 314        | 791        | 8120       | 1.85E-05   |
| cell communication                                       | 122       | 314        | 2271       | 8120       | 1.95E-05   |
| cell-cell signaling                                      | 32        | 314        | 450        | 8120       | 0.00113    |
| cation transport                                         | 22        | 314        | 271        | 8120       | 0.001766   |
| bile acid metabolism                                     | 4         | 314        | 7          | 8120       | 0.001769   |
| cell adhesion                                            | 31        | 314        | 455        | 8120       | 0.002661   |
| lymphocyte differentiation                               | 6         | 314        | 26         | 8120       | 0.00278    |
| lymphocyte activation                                    | 8         | 314        | 50         | 8120       | 0.002838   |
| ion transport                                            | 27        | 314        | 381        | 8120       | 0.003206   |
| T-cell activation                                        | 6         | 314        | 27         | 8120       | 0.003306   |
| cellular process                                         | 198       | 314        | 4502       | 8120       | 0.003688   |
| G-protein coupled receptor protein signaling pathway     | 29        | 314        | 425        | 8120       | 0.003711   |
| signal transduction                                      | 89        | 314        | 1781       | 8120       | 0.005177   |
| positive regulation of cell proliferation                | 11        | 314        | 102        | 8120       | 0.005781   |
| cell activation                                          | 8         | 314        | 57         | 8120       | 0.005972   |
| immune cell activation                                   | 8         | 314        | 57         | 8120       | 0.005972   |
| metal ion transport                                      | 17        | 314        | 208        | 8120       | 0.006475   |
| potassium ion transport                                  | 10        | 314        | 88         | 8120       | 0.006592   |
| T-cell differentiation                                   | 4         | 314        | 11         | 8120       | 0.007433   |
| circulation                                              | 10        | 314        | 95         | 8120       | 0.010734   |
| transmembrane receptor protein tyrosine kinase signaling | 10        | 314        | 96         | 8120       | 0.011457   |
| monovalent inorganic cation transport                    | 15        | 314        | 184        | 8120       | 0.011529   |
| posttranslational membrane targeting                     | 4         | 314        | 13         | 8120       | 0.012167   |
| enzyme linked receptor protein signaling pathway         | 13        | 314        | 155        | 8120       | 0.016433   |
| natural killer cell activation                           | 3         | 314        | 7          | 8120       | 0.027355   |
| heart development                                        | 4         | 314        | 18         | 8120       | 0.030124   |
| hemopoiesis                                              | 6         | 314        | 48         | 8120       | 0.036453   |
| cellular defense response                                | 8         | 314        | 83         | 8120       | 0.04042    |
| muscle development                                       | 10        | 314        | 120        | 8120       | 0.041785   |
| cell-cell adhesion                                       | 11        | 314        | 140        | 8120       | 0.04372    |
| neuropeptide signaling pathway                           | 7         | 314        | 68         | 8120       | 0.046388   |
| steroid metabolism                                       | 9         | 314        | 104        | 8120       | 0.047041   |

**Table S14.** Over-represented biological processes within the transcripts with the lowest  $G_0$  in yeast as identified by DAVID software (6) Biological categories that are significantly over-represented (first 65 categories) among the 714 transcripts with the lowest (less than -0.016, Fig. S10)  $G_{i0}$ . Note that the biological processes are not autonomous and many of the

categories overlap. (**Count**, number of genes with particular GO term in the gene list; **List total**, number of genes in the gene list mapped to any GO term; **Population hits**, number of genes with particular GO term in the whole chip; **Population total**, number of genes in the whole chip mapped to any GO term.

| Term                                             | Count | %        | PValue   | List Total | Pop Hits | Pop Total | Benjamini |
|--------------------------------------------------|-------|----------|----------|------------|----------|-----------|-----------|
| GO:0006412~translation                           | 222   | 31.66904 | 1.61E-45 | 657        | 677      | 4870      | 2.39E-42  |
| GO:0055114~oxidation reduction                   | 148   | 21.1127  | 3.85E-43 | 657        | 353      | 4870      | 2.86E-40  |
| GO:0006417~regulation of translation             | 89    | 12.69615 | 8.11E-32 | 657        | 180      | 4870      | 4.01E-29  |
| GO:0032268~regulation of cellular protein metabo | 94    | 13.40942 | 3.18E-31 | 657        | 201      | 4870      | 1.18E-28  |
| GO:0044271~nitrogen compound biosynthetic pro    | 122   | 17.40371 | 9.41E-31 | 657        | 317      | 4870      | 2.79E-28  |
| GO:0010608~posttranscriptional regulation of gen | 90    | 12.8388  | 5.93E-30 | 657        | 192      | 4870      | 1.46E-27  |
| GO:0006091~generation of precursor metabolites   | 107   | 15.26391 | 4.76E-29 | 657        | 264      | 4870      | 1.01E-26  |
| GO:0016053~organic acid biosynthetic process     | 77    | 10.98431 | 5.60E-24 | 657        | 172      | 4870      | 1.04E-21  |
| GO:0046394~carboxylic acid biosynthetic proces   | 77    | 10.98431 | 5.60E-24 | 657        | 172      | 4870      | 1.04E-21  |
| GO:0006119~oxidative phosphorylation             | 42    | 5.991441 | 3.69E-23 | 657        | 59       | 4870      | 6.09E-21  |
| GO:0008652~cellular amino acid biosynthetic pro  | 62    | 8.844508 | 3.37E-20 | 657        | 134      | 4870      | 5.00E-18  |
| GO:0009309~amine biosynthetic process            | 62    | 8.844508 | 1.20E-18 | 657        | 142      | 4870      | 1.62E-16  |
| GO:0006811~ion transport                         | 78    | 11.12696 | 1.62E-18 | 657        | 209      | 4870      | 2.00E-16  |
| GO:0019320~hexose catabolic process              | 34    | 4.850214 | 1.32E-15 | 657        | 56       | 4870      | 1.52E-13  |
| GO:0046365~monosaccharide catabolic process      | 35    | 4.992867 | 2.61E-15 | 657        | 60       | 4870      | 2.70E-13  |
| GO:0006818~hydrogen transport                    | 27    | 3.851641 | 8.15E-15 | 657        | 38       | 4870      | 8.01E-13  |
| GO:0015992~proton transport                      | 27    | 3.851641 | 8.15E-15 | 657        | 38       | 4870      | 8.01E-13  |
| GO:0046164~alcohol catabolic process             | 36    | 5.135521 | 8.28E-15 | 657        | 65       | 4870      | 7.72E-13  |
| GO:0044275~cellular carbohydrate catabolic proc  | 39    | 5.563481 | 1.39E-14 | 657        | 76       | 4870      | 1.21E-12  |
| GO:0051186~cofactor metabolic process            | 70    | 9.985735 | 1.75E-14 | 657        | 203      | 4870      | 1.44E-12  |
| GO:0008219~cell death                            | 30    | 4.279601 | 1.33E-13 | 657        | 50       | 4870      | 1.04E-11  |
| GO:0016265~death                                 | 30    | 4.279601 | 1.33E-13 | 657        | 50       | 4870      | 1.04E-11  |
| GO:0016052~carbohydrate catabolic process        | 40    | 5.706134 | 1.38E-13 | 657        | 84       | 4870      | 1.02E-11  |
| GO:0006007~glucose catabolic process             | 29    | 4.136947 | 1.18E-12 | 657        | 50       | 4870      | 8.34E-11  |
| GO:0006163~purine nucleotide metabolic proces    | 37    | 5.278174 | 1.55E-12 | 657        | 78       | 4870      | 1.04E-10  |
| GO:0015986~ATP synthesis coupled proton trans    | 22    | 3.138374 | 1.69E-12 | 657        | 30       | 4870      | 1.09E-10  |
| GO:0015985~energy coupled proton transport, dc   | 22    | 3.138374 | 1.69E-12 | 657        | 30       | 4870      | 1.09E-10  |
| GO:0009150~purine ribonucleotide metabolic pro   | 35    | 4.992867 | 1.75E-12 | 657        | 71       | 4870      | 1.08E-10  |
| GO:0019318~hexose metabolic process              | 48    | 6.847361 | 2.04E-12 | 657        | 122      | 4870      | 1.21E-10  |
| GO:0006164~purine nucleotide biosynthetic proce  | 36    | 5.135521 | 2.13E-12 | 657        | 75       | 4870      | 1.21E-10  |
| GO:0034220~ion transmembrane transport           | 27    | 3.851641 | 2.87E-12 | 657        | 45       | 4870      | 1.58E-10  |
| GO:0009152~purine ribonucleotide biosynthetic p  | 34    | 4.850214 | 3.93E-12 | 657        | 69       | 4870      | 2.08E-10  |
| GO:0005996~monosaccharide metabolic proces       | 50    | 7.132668 | 1.24E-11 | 657        | 136      | 4870      | 6.36E-10  |
| GO:0042775~mitochondrial ATP synthesis couple    | 20    | 2.853067 | 4.76E-11 | 657        | 28       | 4870      | 2.36E-09  |
| GO:0042773~ATP synthesis coupled electron tra    | 20    | 2.853067 | 4.76E-11 | 657        | 28       | 4870      | 2.36E-09  |
| GO:0015980~energy derivation by oxidation of org | 58    | 8.273894 | 6.09E-11 | 657        | 178      | 4870      | 2.91E-09  |
| GO:0022900~electron transport chain              | 32    | 4.564907 | 8.52E-11 | 657        | 68       | 4870      | 3.95E-09  |
| GO:0034654~nucleobase, nucleoside, nucleotide    | 47    | 6.704708 | 1.50E-10 | 657        | 131      | 4870      | 6.73E-09  |
| GO:0034404~nucleobase, nucleoside and nucleo     | 47    | 6.704708 | 1.50E-10 | 657        | 131      | 4870      | 6.73E-09  |
| GO:0009259~ribonucleotide metabolic process      | 35    | 4.992867 | 1.67E-10 | 657        | 81       | 4870      | 7.28E-09  |
| GO:0016129~phytosteroid biosynthetic process     | 18    | 2.56776  | 1.81E-10 | 657        | 24       | 4870      | 7.65E-09  |
| GO:0006696~ergosterol biosynthetic process       | 18    | 2.56776  | 1.81E-10 | 657        | 24       | 4870      | 7.65E-09  |
| GO:0006096~glycolysis                            | 20    | 2.853067 | 2.89E-10 | 657        | 30       | 4870      | 1.19E-08  |
| GO:0009206~purine ribonucleoside triphosphate l  | 26    | 3.708987 | 2.93E-10 | 657        | 49       | 4870      | 1.17E-08  |
| GO:0009145~purine nucleoside triphosphate bios   | 26    | 3.708987 | 2.93E-10 | 657        | 49       | 4870      | 1.17E-08  |
| GO:0009260~ribonucleotide biosynthetic process   | 34    | 4.850214 | 3.65E-10 | 657        | 79       | 4870      | 1.42E-08  |
| GO:0006754~ATP biosynthetic process              | 25    | 3.566334 | 3.67E-10 | 657        | 46       | 4870      | 1.40E-08  |
| GO:0009165~nucleotide biosynthetic process       | 44    | 6.276748 | 3.94E-10 | 657        | 121      | 4870      | 1.46E-08  |
| GO:0006006~glucose metabolic process             | 39    | 5.563481 | 4.61E-10 | 657        | 100      | 4870      | 1.67E-08  |
| GO:0009205~purine ribonucleoside triphosphate l  | 26    | 3.708987 | 5.13E-10 | 657        | 50       | 4870      | 1.81E-08  |
| GO:0009144~purine nucleoside triphosphate met    | 26    | 3.708987 | 5.13E-10 | 657        | 50       | 4870      | 1.81E-08  |
| GO:0006084~acetyl-CoA metabolic process          | 21    | 2.99572  | 6.47E-10 | 657        | 34       | 4870      | 2.23E-08  |
| GO:0046034~ATP metabolic process                 | 25    | 3.566334 | 6.56E-10 | 657        | 47       | 4870      | 2.21E-08  |
| GO:0015672~monovalent inorganic cation transp    | 27    | 3.851641 | 6.63E-10 | 657        | 54       | 4870      | 2.19E-08  |
| GO:0009201~ribonucleoside triphosphate biosynt   | 26    | 3.708987 | 8.80E-10 | 657        | 51       | 4870      | 2.84E-08  |
| GO:0045333~cellular respiration                  | 43    | 6.134094 | 1.09E-09 | 657        | 120      | 4870      | 3.45E-08  |
| GO:0008204~ergosterol metabolic process          | 18    | 2.56776  | 1.25E-09 | 657        | 26       | 4870      | 3.86E-08  |
| GO:0016128~phytosteroid metabolic process        | 18    | 2.56776  | 1.25E-09 | 657        | 26       | 4870      | 3.86E-08  |
| GO:0022904~respiratory electron transport chain  | 20    | 2.853067 | 1.41E-09 | 657        | 32       | 4870      | 4.26E-08  |
| GO:0009199~ribonucleoside triphosphate metabo    | 26    | 3.708987 | 1.48E-09 | 657        | 52       | 4870      | 4.40E-08  |
| GO:0009142~nucleoside triphosphate biosynthesi   | 26    | 3.708987 | 2.46E-09 | 657        | 53       | 4870      | 7.14E-08  |
| GO:0006812~cation transport                      | 46    | 6.562054 | 3.68E-09 | 657        | 138      | 4870      | 1.49E-07  |
| GO:0006694~steroid biosynthetic process          | 20    | 2.853067 | 5.77E-09 | 657        | 34       | 4870      | 1.61E-07  |
| GO:0016126~sterol biosynthetic process           | 20    | 2.853067 | 5.77E-09 | 657        | 34       | 4870      | 1.61E-07  |



**Table S15.** Over-represented biological processes within the transcripts with the mid  $G_{oi}$  in yeast as identified by DAVID software. Biological categories that were significantly over-represented (first 65 categories) among the 3000 probes with the mid  $G_{i0}$  (-0.012- (-0.015), Fig. S10).

| Term                                             | Count | PValue   | List Total | Pop Hits | Pop Total | Benjamini |
|--------------------------------------------------|-------|----------|------------|----------|-----------|-----------|
| GO:0006350~transcription                         | 382   | 1.00E-18 | 2483       | 5.59E+02 | 4870      | 2.42E-15  |
| GO:0008104~protein localization                  | 394   | 3.80E-15 | 2483       | 5.97E+02 | 4870      | 4.56E-12  |
| GO:0045184~establishment of protein localizatio  | 361   | 4.02E-15 | 2483       | 5.40E+02 | 4870      | 3.22E-12  |
| GO:0032774~RNA biosynthetic process              | 171   | 2.80E-13 | 2483       | 2.30E+02 | 4870      | 1.69E-10  |
| GO:0015031~protein transport                     | 333   | 3.14E-13 | 2483       | 5.02E+02 | 4870      | 1.52E-10  |
| GO:0006351~transcription, DNA-dependent          | 169   | 6.19E-13 | 2483       | 2.28E+02 | 4870      | 2.50E-10  |
| GO:0045449~regulation of transcription           | 420   | 8.17E-13 | 2483       | 6.57E+02 | 4870      | 2.82E-10  |
| GO:0006366~transcription from RNA polymerase     | 132   | 9.98E-13 | 2483       | 1.70E+02 | 4870      | 3.02E-10  |
| GO:0051301~cell division                         | 233   | 3.90E-10 | 2483       | 3.47E+02 | 4870      | 1.05E-07  |
| GO:0046907~intracellular transport               | 378   | 3.21E-09 | 2483       | 6.08E+02 | 4870      | 7.76E-07  |
| GO:0016192~vesicle-mediated transport            | 246   | 5.27E-09 | 2483       | 3.76E+02 | 4870      | 1.16E-06  |
| GO:0070727~cellular macromolecule localizatio    | 245   | 6.92E-09 | 2483       | 3.75E+02 | 4870      | 1.39E-06  |
| GO:0051252~regulation of RNA metabolic proces    | 298   | 1.34E-08 | 2483       | 4.70E+02 | 4870      | 2.48E-06  |
| GO:0006355~regulation of transcription, DNA-dep  | 292   | 2.24E-08 | 2483       | 4.61E+02 | 4870      | 3.87E-06  |
| GO:0070271~protein complex biogenesis            | 165   | 2.72E-08 | 2483       | 2.41E+02 | 4870      | 4.39E-06  |
| GO:0006461~protein complex assembly              | 165   | 2.72E-08 | 2483       | 2.41E+02 | 4870      | 4.39E-06  |
| GO:0034613~cellular protein localization         | 235   | 3.45E-08 | 2483       | 3.62E+02 | 4870      | 5.59E-06  |
| GO:0043933~macromolecular complex subunit c      | 323   | 5.20E-08 | 2483       | 5.19E+02 | 4870      | 7.40E-06  |
| GO:0006886~intracellular protein transport       | 213   | 5.50E-08 | 2483       | 3.25E+02 | 4870      | 7.39E-06  |
| GO:0051325~interphase                            | 84    | 9.01E-08 | 2483       | 1.10E+02 | 4870      | 1.15E-05  |
| GO:0034621~cellular macromolecular complex s     | 271   | 2.13E-07 | 2483       | 4.31E+02 | 4870      | 2.58E-05  |
| GO:0051329~interphase of mitotic cell cycle      | 80    | 2.29E-07 | 2483       | 1.05E+02 | 4870      | 2.64E-05  |
| GO:0016568~chromatin modification                | 130   | 2.67E-07 | 2483       | 1.87E+02 | 4870      | 2.94E-05  |
| GO:0006354~RNA elongation                        | 50    | 6.84E-07 | 2483       | 6.00E+01 | 4870      | 7.19E-05  |
| GO:0006396~RNA processing                        | 50    | 6.84E-07 | 2483       | 6.00E+01 | 4870      | 7.19E-05  |
| GO:0006468~protein amino acid phosphorylation    | 99    | 9.44E-07 | 2483       | 1.38E+02 | 4870      | 9.03E-05  |
| GO:0006338~chromatin remodeling                  | 56    | 1.53E-06 | 2483       | 7.00E+01 | 4870      | 1.43E-04  |
| GO:0006368~RNA elongation from RNA polymer       | 47    | 2.89E-06 | 2483       | 5.70E+01 | 4870      | 2.59E-04  |
| GO:0006605~protein targeting                     | 157   | 3.30E-06 | 2483       | 2.39E+02 | 4870      | 2.85E-04  |
| GO:0043623~cellular protein complex assembly     | 89    | 3.57E-06 | 2483       | 1.24E+02 | 4870      | 2.85E-04  |
| GO:0006357~regulation of transcription from RN   | 171   | 4.18E-06 | 2483       | 2.64E+02 | 4870      | 3.37E-04  |
| GO:0000910~cytokinesis                           | 82    | 4.66E-06 | 2483       | 1.13E+02 | 4870      | 3.63E-04  |
| GO:0000278~mitotic cell cycle                    | 196   | 5.99E-06 | 2483       | 309      | 4870      | 4.52E-04  |
| GO:0000902~cell morphogenesis                    | 105   | 7.09E-06 | 2483       | 152      | 4870      | 5.19E-04  |
| GO:0042157~lipoprotein metabolic process         | 45    | 7.42E-06 | 2483       | 55       | 4870      | 5.27E-04  |
| GO:0006367~transcription initiation from RNA po  | 39    | 7.57E-06 | 2483       | 46       | 4870      | 5.23E-04  |
| GO:0006325~chromatin organization                | 145   | 9.18E-06 | 2483       | 221      | 4870      | 6.16E-04  |
| GO:0042158~lipoprotein biosynthetic process      | 44    | 1.18E-05 | 2483       | 54       | 4870      | 7.71E-04  |
| GO:0006497~protein amino acid lipidation         | 44    | 1.18E-05 | 2483       | 54       | 4870      | 7.71E-04  |
| GO:0007010~cytoskeleton organization             | 143   | 3.13E-05 | 2483       | 221      | 4870      | 0.001991  |
| GO:0016197~endosome transport                    | 49    | 3.22E-05 | 2483       | 63       | 4870      | 0.001991  |
| GO:0034470~ncRNA processing                      | 207   | 3.83E-05 | 2483       | 335      | 4870      | 0.002312  |
| GO:0048193~Golgi vesicle transport               | 121   | 4.87E-05 | 2483       | 184      | 4870      | 0.002865  |
| GO:0006611~protein export from nucleus           | 31    | 5.25E-05 | 2483       | 36       | 4870      | 0.003014  |
| GO:0065003~macromolecular complex assembl        | 242   | 6.19E-05 | 2483       | 400      | 4870      | 0.003476  |
| GO:0002097~tRNA wobble base modification         | 24    | 6.23E-05 | 2483       | 26       | 4870      | 0.003418  |
| GO:0002098~tRNA wobble uridine modification      | 24    | 6.23E-05 | 2483       | 26       | 4870      | 0.003418  |
| GO:0031123~RNA 3'-end processing                 | 55    | 8.35E-05 | 2483       | 74       | 4870      | 0.004474  |
| GO:0006352~transcription initiation              | 50    | 8.58E-05 | 2483       | 66       | 4870      | 0.0045    |
| GO:0008033~tRNA processing                       | 75    | 8.70E-05 | 2483       | 107      | 4870      | 0.004462  |
| GO:0051276~chromosome organization               | 234   | 8.83E-05 | 2483       | 387      | 4870      | 0.004438  |
| GO:0007242~intracellular signaling cascade       | 113   | 9.57E-05 | 2483       | 172      | 4870      | 0.004707  |
| GO:0006400~tRNA modification                     | 51    | 1.11E-04 | 2483       | 68       | 4870      | 0.005339  |
| GO:0032506~cytokinetic process                   | 68    | 1.21E-04 | 2483       | 96       | 4870      | 0.005716  |
| GO:0031124~mRNA 3'-end processing                | 33    | 1.38E-04 | 2483       | 40       | 4870      | 0.006374  |
| GO:0016071~mRNA metabolic process                | 168   | 1.38E-04 | 2483       | 270      | 4870      | 0.006294  |
| GO:0000086~G2/M transition of mitotic cell cycle | 31    | 1.42E-04 | 2483       | 37       | 4870      | 0.006341  |
| GO:0007049~cell cycle                            | 362   | 2.23E-04 | 2483       | 627      | 4870      | 0.009761  |
| GO:0007034~vacuolar transport                    | 82    | 2.32E-04 | 2483       | 121      | 4870      | 0.009969  |
| GO:0043044~ATP-dependent chromatin remode        | 28    | 2.34E-04 | 2483       | 33       | 4870      | 0.009869  |

**Table S16.** Over-represented biological processes within the transcripts with the highest  $G_{i0}$  in yeast as identified by DAVID software . Biological categories that were significantly over-represented (Benjamini < 0.05) among the 500 probes with the high  $G_{i0}$  greater than - 0.011, Figure S10).

| Term                                     | Count | PValue   | List Total | Pop Hits | Pop Total | Benjamini |
|------------------------------------------|-------|----------|------------|----------|-----------|-----------|
| GO:0019953~sexual reproduction           | 45    | 1.85E-06 | 376        | 2.77E+02 | 4870      | 0.002183  |
| GO:0048610~reproductive cellular proce   | 40    | 5.82E-06 | 376        | 2.43E+02 | 4870      | 0.003426  |
| GO:0007126~meiosis                       | 33    | 7.73E-06 | 376        | 1.84E+02 | 4870      | 0.003032  |
| GO:0051327~M phase of meiotic cell cyc   | 33    | 7.73E-06 | 376        | 1.84E+02 | 4870      | 0.003032  |
| GO:0051321~meiotic cell cycle            | 33    | 1.54E-05 | 376        | 1.90E+02 | 4870      | 0.004525  |
| GO:0043934~sporulation                   | 36    | 2.19E-05 | 376        | 2.20E+02 | 4870      | 0.005157  |
| GO:0030435~sporulation resulting in forn | 36    | 2.19E-05 | 376        | 2.20E+02 | 4870      | 0.005157  |

**Table S17.** Over-represented biological processes within the transcripts with the highest  $G_{i1}$  in the HF1 cells as identified by EASE software. Biological categories that were significantly over-represented (EASE < 0.01) among the 1400 probes with the biggest absolute  $G_{i1}$  and mid  $G_{i0}$  (greater than -0.01 and less than -0.06, Figure S6).

| Gene Category                              | List Hits | List Total | Population | Population | EASE score |
|--------------------------------------------|-----------|------------|------------|------------|------------|
| mitotic cell cycle                         | 70        | 1077       | 329        | 10937      | 6.99E-10   |
| cell cycle                                 | 114       | 1077       | 690        | 10937      | 2.08E-08   |
| cell proliferation                         | 156       | 1077       | 1036       | 10937      | 2.50E-08   |
| DNA replication and chromosome cycle       | 40        | 1077       | 186        | 10937      | 3.72E-06   |
| M phase                                    | 34        | 1077       | 157        | 10937      | 1.94E-05   |
| nuclear division                           | 33        | 1077       | 151        | 10937      | 2.17E-05   |
| M phase of mitotic cell cycle              | 28        | 1077       | 123        | 10937      | 4.90E-05   |
| mitosis                                    | 27        | 1077       | 121        | 10937      | 9.79E-05   |
| regulation of cell cycle                   | 61        | 1077       | 384        | 10937      | 0.000188   |
| S phase of mitotic cell cycle              | 30        | 1077       | 147        | 10937      | 0.000197   |
| cell cycle arrest                          | 15        | 1077       | 52         | 10937      | 0.000362   |
| DNA replication                            | 29        | 1077       | 146        | 10937      | 0.00041    |
| cell growth and/or maintenance             | 384       | 1077       | 3436       | 10937      | 0.00115    |
| DNA metabolism                             | 73        | 1077       | 517        | 10937      | 0.001412   |
| cell growth                                | 21        | 1077       | 108        | 10937      | 0.003979   |
| G1 phase of mitotic cell cycle             | 7         | 1077       | 17         | 10937      | 0.004267   |
| amine metabolism                           | 48        | 1077       | 328        | 10937      | 0.00528    |
| phenol metabolism                          | 10        | 1077       | 35         | 10937      | 0.005587   |
| regulation of catabolism                   | 6         | 1077       | 13         | 10937      | 0.005989   |
| mitotic anaphase                           | 6         | 1077       | 13         | 10937      | 0.005989   |
| coenzyme and prosthetic group biosynthesis | 18        | 1077       | 90         | 10937      | 0.006189   |
| regulation of proteolysis and peptidolysis | 5         | 1077       | 9          | 10937      | 0.00783    |
| mitotic chromosome segregation             | 5         | 1077       | 9          | 10937      | 0.00783    |

**Table S18.** Over-represented biological processes within the transcripts with the highest  $G_{i1}$  in the HF1 cells as identified by EASE software. Biological categories that are significantly over-represented (EASE < 0.01) among the 2830 probes with the largest absolute  $G_{i1}$  and high  $G_{i0}$  (greater than -0.06, Figure S6).

| Gene Category                                                    | List Hits | List Total | Population | Population | EASE score |
|------------------------------------------------------------------|-----------|------------|------------|------------|------------|
| development                                                      | 412       | 1864       | 1683       | 10937      | 2.32E-17   |
| organogenesis                                                    | 241       | 1864       | 901        | 10937      | 2.39E-14   |
| morphogenesis                                                    | 263       | 1864       | 1010       | 10937      | 3.89E-14   |
| cell communication                                               | 606       | 1864       | 2791       | 10937      | 7.89E-14   |
| immune response                                                  | 174       | 1864       | 682        | 10937      | 8.35E-09   |
| response to external stimulus                                    | 289       | 1864       | 1263       | 10937      | 1.26E-08   |
| cell adhesion                                                    | 142       | 1864       | 542        | 10937      | 4.23E-08   |
| defense response                                                 | 185       | 1864       | 756        | 10937      | 7.35E-08   |
| response to biotic stimulus                                      | 198       | 1864       | 821        | 10937      | 7.63E-08   |
| neurogenesis                                                     | 106       | 1864       | 404        | 10937      | 2.48E-06   |
| cell-cell signaling                                              | 129       | 1864       | 525        | 10937      | 7.21E-06   |
| signal transduction                                              | 443       | 1864       | 2196       | 10937      | 1.24E-05   |
| cell surface receptor linked signal transduction                 | 218       | 1864       | 991        | 10937      | 2.00E-05   |
| circulation                                                      | 38        | 1864       | 111        | 10937      | 2.06E-05   |
| cellular process                                                 | 1054      | 1864       | 5719       | 10937      | 3.24E-05   |
| cell differentiation                                             | 51        | 1864       | 172        | 10937      | 5.57E-05   |
| response to pest/pathogen/parasite                               | 108       | 1864       | 444        | 10937      | 6.77E-05   |
| cell-cell adhesion                                               | 54        | 1864       | 187        | 10937      | 7.13E-05   |
| ion transport                                                    | 122       | 1864       | 516        | 10937      | 8.29E-05   |
| skeletal development                                             | 39        | 1864       | 125        | 10937      | 0.000153   |
| pregnancy                                                        | 19        | 1864       | 45         | 10937      | 0.000218   |
| cation transport                                                 | 91        | 1864       | 374        | 10937      | 0.000265   |
| metal ion transport                                              | 71        | 1864       | 283        | 10937      | 0.000548   |
| perception of external stimulus                                  | 76        | 1864       | 315        | 10937      | 0.001146   |
| muscle development                                               | 38        | 1864       | 133        | 10937      | 0.001212   |
| lymphocyte activation                                            | 20        | 1864       | 57         | 10937      | 0.002039   |
| central nervous system development                               | 32        | 1864       | 112        | 10937      | 0.00316    |
| transmission of nerve impulse                                    | 58        | 1864       | 240        | 10937      | 0.004475   |
| frizzled-2 signaling pathway                                     | 8         | 1864       | 14         | 10937      | 0.004636   |
| G-protein coupled receptor protein signaling pathway             | 121       | 1864       | 566        | 10937      | 0.004799   |
| cartilage condensation                                           | 7         | 1864       | 11         | 10937      | 0.005135   |
| response to light                                                | 43        | 1864       | 168        | 10937      | 0.005322   |
| synaptic transmission                                            | 56        | 1864       | 232        | 10937      | 0.005378   |
| response to abiotic stimulus                                     | 111       | 1864       | 516        | 10937      | 0.005687   |
| potassium ion transport                                          | 35        | 1864       | 131        | 10937      | 0.006253   |
| monovalent inorganic cation transport                            | 58        | 1864       | 244        | 10937      | 0.006456   |
| cell activation                                                  | 21        | 1864       | 67         | 10937      | 0.006581   |
| immune cell activation                                           | 21        | 1864       | 67         | 10937      | 0.006581   |
| homophilic cell adhesion                                         | 24        | 1864       | 81         | 10937      | 0.007296   |
| perception of pest/pathogen/parasite                             | 8         | 1864       | 15         | 10937      | 0.007428   |
| perception of biotic stimulus                                    | 8         | 1864       | 15         | 10937      | 0.007428   |
| neuropeptide signaling pathway                                   | 25        | 1864       | 86         | 10937      | 0.007835   |
| transmembrane receptor protein tyrosine kinase signaling pathway | 31        | 1864       | 114        | 10937      | 0.007992   |
| perception of abiotic stimulus                                   | 65        | 1864       | 282        | 10937      | 0.008034   |
| response to wounding                                             | 61        | 1864       | 262        | 10937      | 0.00826    |
| heterophilic cell adhesion                                       | 24        | 1864       | 82         | 10937      | 0.008545   |
| respiratory gaseous exchange                                     | 9         | 1864       | 19         | 10937      | 0.008956   |
| response to radiation                                            | 45        | 1864       | 183        | 10937      | 0.009212   |
| histogenesis                                                     | 32        | 1864       | 120        | 10937      | 0.00939    |
| melanin biosynthesis                                             | 5         | 1864       | 6          | 10937      | 0.009411   |
| melanin biosynthesis from tyrosine                               | 5         | 1864       | 6          | 10937      | 0.009411   |
| vision                                                           | 40        | 1864       | 159        | 10937      | 0.00979    |
| perception of light                                              | 41        | 1864       | 164        | 10937      | 0.009894   |

**Table S19. Over-represented biological processes within the transcripts with the lowest  $G_{0i}$  in E.Coli as identified by DAVID software . Biological categories that were significantly over-represented (Benjamini p-value < 0.05) among the 490 transcripts with the lowest (less than -0.015)  $G_{0i}$  .**

| Term                                                           | Count | %        | PValue   | List Total | Pop Hits | Pop Total | Benjamini |
|----------------------------------------------------------------|-------|----------|----------|------------|----------|-----------|-----------|
| GO:0006412-translation                                         | 50    | 15.33742 | 5.68E-42 | 236        | 253      | 16709     | 2.87E-39  |
| GO:0006091-generation of precursor metabolites and energy      | 42    | 12.88344 | 4.92E-14 | 236        | 746      | 16709     | 1.24E-11  |
| GO:0032268-regulation of cellular protein metabolic process    | 11    | 3.374233 | 2.44E-11 | 236        | 34       | 16709     | 4.11E-09  |
| GO:0006417-regulation of translation                           | 11    | 3.374233 | 2.44E-11 | 236        | 34       | 16709     | 4.11E-09  |
| GO:0015980-energy derivation by oxidation of organic compounds | 28    | 8.588957 | 4.21E-11 | 236        | 418      | 16709     | 5.32E-09  |
| GO:0010608-posttranscriptional regulation of gene expression   | 11    | 3.374233 | 3.19E-10 | 236        | 43       | 16709     | 3.23E-08  |
| GO:0045333-cellular respiration                                | 25    | 7.668712 | 5.27E-10 | 236        | 371      | 16709     | 4.43E-08  |
| GO:0009060-aerobic respiration                                 | 16    | 4.907975 | 6.61E-10 | 236        | 134      | 16709     | 4.77E-08  |
| GO:0006084-acetyl-CoA metabolic process                        | 14    | 4.294479 | 2.69E-09 | 236        | 105      | 16709     | 1.70E-07  |
| GO:0046356-acetyl-CoA catabolic process                        | 12    | 3.680982 | 2.88E-08 | 236        | 85       | 16709     | 1.62E-06  |
| GO:0006099-tricarboxylic acid cycle                            | 12    | 3.680982 | 2.88E-08 | 236        | 85       | 16709     | 1.62E-06  |
| GO:0006090-pyruvate metabolic process                          | 10    | 3.067485 | 4.02E-08 | 236        | 52       | 16709     | 2.03E-06  |
| GO:0051187-cofactor catabolic process                          | 12    | 3.680982 | 5.93E-08 | 236        | 91       | 16709     | 2.72E-06  |
| GO:0009109-coenzyme catabolic process                          | 12    | 3.680982 | 5.93E-08 | 236        | 91       | 16709     | 2.72E-06  |
| GO:0009628-response to abiotic stimulus                        | 12    | 3.680982 | 1.29E-07 | 236        | 98       | 16709     | 5.42E-06  |
| GO:0009061-anaerobic respiration                               | 14    | 4.294479 | 3.97E-07 | 236        | 159      | 16709     | 1.54E-05  |
| GO:0006096-glycolysis                                          | 12    | 3.680982 | 4.64E-07 | 236        | 111      | 16709     | 1.67E-05  |
| GO:0046164-alcohol catabolic process                           | 16    | 4.907975 | 5.99E-07 | 236        | 222      | 16709     | 2.02E-05  |
| GO:0044275-cellular carbohydrate catabolic process             | 16    | 4.907975 | 1.05E-06 | 236        | 232      | 16709     | 3.30E-05  |
| GO:0046365-monosaccharide catabolic process                    | 15    | 4.601227 | 1.26E-06 | 236        | 205      | 16709     | 3.75E-05  |
| GO:0009386-translational attenuation                           | 5     | 1.533742 | 1.29E-06 | 236        | 7        | 16709     | 3.62E-05  |
| GO:0006351-transcription, DNA-dependent                        | 9     | 2.760736 | 1.42E-06 | 236        | 58       | 16709     | 3.78E-05  |
| GO:0032774-RNA biosynthetic process                            | 10    | 3.067485 | 1.80E-06 | 236        | 80       | 16709     | 4.54E-05  |
| GO:0006007-glucose catabolic process                           | 14    | 4.294479 | 1.85E-06 | 236        | 182      | 16709     | 4.44E-05  |
| GO:0019320-hexose catabolic process                            | 14    | 4.294479 | 2.09E-06 | 236        | 184      | 16709     | 4.79E-05  |
| GO:0016052-carbohydrate catabolic process                      | 26    | 7.97546  | 2.43E-06 | 236        | 622      | 16709     | 5.33E-05  |
| GO:0051186-cofactor metabolic process                          | 27    | 8.282209 | 4.19E-06 | 236        | 684      | 16709     | 8.82E-05  |
| GO:0016226-iron-sulfur cluster assembly                        | 7     | 2.147239 | 2.86E-05 | 236        | 43       | 16709     | 5.78E-04  |
| GO:0031163-metallo-sulfur cluster assembly                     | 7     | 2.147239 | 2.86E-05 | 236        | 43       | 16709     | 5.78E-04  |
| GO:0006006-glucose metabolic process                           | 17    | 5.214724 | 3.92E-05 | 236        | 351      | 16709     | 7.61E-04  |
| GO:0006970-response to osmotic stress                          | 6     | 1.840491 | 3.98E-05 | 236        | 28       | 16709     | 7.44E-04  |
| GO:0006353-transcription termination                           | 4     | 1.226994 | 5.32E-05 | 236        | 6        | 16709     | 9.60E-04  |
| GO:0006732-coenzyme metabolic process                          | 19    | 5.828221 | 1.17E-04 | 236        | 468      | 16709     | 0.002033  |
| GO:0006094-gluconeogenesis                                     | 6     | 1.840491 | 3.28E-04 | 236        | 43       | 16709     | 0.005512  |
| GO:0019319-hexose biosynthetic process                         | 6     | 1.840491 | 4.07E-04 | 236        | 45       | 16709     | 0.006614  |
| GO:0046487-glyoxylate metabolic process                        | 6     | 1.840491 | 4.07E-04 | 236        | 45       | 16709     | 0.006614  |
| GO:0019318-hexose metabolic process                            | 17    | 5.214724 | 6.15E-04 | 236        | 447      | 16709     | 0.009662  |
| GO:0019402-galactitol metabolic process                        | 5     | 1.533742 | 7.84E-04 | 236        | 30       | 16709     | 0.011932  |
| GO:0006059-hexitol metabolic process                           | 5     | 1.533742 | 7.84E-04 | 236        | 30       | 16709     | 0.011932  |
| GO:0006081-cellular aldehyde metabolic process                 | 6     | 1.840491 | 8.00E-04 | 236        | 52       | 16709     | 0.011816  |
| GO:0043933-macromolecular complex subunit organization         | 9     | 2.760736 | 0.001346 | 236        | 151      | 16709     | 0.01925   |
| GO:0009266-response to temperature stimulus                    | 5     | 1.533742 | 0.002132 | 236        | 39       | 16709     | 0.029495  |
| GO:0032984-macromolecular complex disassembly                  | 4     | 1.226994 | 0.003471 | 236        | 22       | 16709     | 0.046354  |
| GO:0022411-cellular component disassembly                      | 4     | 1.226994 | 0.003471 | 236        | 22       | 16709     | 0.046354  |
| GO:0034623-cellular macromolecular complex disassembly         | 4     | 1.226994 | 0.003471 | 236        | 22       | 16709     | 0.046354  |
| GO:0043241-protein complex disassembly                         | 4     | 1.226994 | 0.003471 | 236        | 22       | 16709     | 0.046354  |
| GO:0043624-cellular protein complex disassembly                | 4     | 1.226994 | 0.003471 | 236        | 22       | 16709     | 0.046354  |

**Table S20. Over-represented biological processes within the transcripts with the mid  $G_{0i}$  in E.Coli as identified by DADID software.** Biological categories that were significantly over-represented (Benjamini p-value < 0.01) among the 5600 probes with the mid  $G_{0i}$  (-0.009-(-0.014)).

| Term                                                     | Count | PValue   | List Total | Pop Hits | Pop Total | Benjamini |
|----------------------------------------------------------|-------|----------|------------|----------|-----------|-----------|
| GO:0044271--nitrogen compound biosynthetic process       | 293   | 1.84E-34 | 2093       | 1164     | 16709     | 2.21E-31  |
| GO:0016052--carbohydrate catabolic process               | 183   | 4.98E-30 | 2093       | 622      | 16709     | 2.99E-27  |
| GO:0015949--nucleobase, nucleoside and nucleotide inte   | 43    | 2.14E-24 | 2093       | 61       | 16709     | 8.58E-22  |
| GO:0009309--amine biosynthetic process                   | 160   | 1.90E-21 | 2093       | 600      | 16709     | 5.70E-19  |
| GO:0009061--anaerobic respiration                        | 68    | 5.59E-21 | 2093       | 159      | 16709     | 1.34E-18  |
| GO:0046394--carboxylic acid biosynthetic process         | 170   | 2.67E-19 | 2093       | 685      | 16709     | 5.34E-17  |
| GO:0016053--organic acid biosynthetic process            | 170   | 4.24E-19 | 2093       | 688      | 16709     | 7.27E-17  |
| GO:0008652--cellular amino acid biosynthetic process     | 145   | 5.08E-19 | 2093       | 550      | 16709     | 7.62E-17  |
| GO:0016051--carbohydrate biosynthetic process            | 146   | 1.31E-14 | 2093       | 617      | 16709     | 1.75E-12  |
| GO:0000271--polysaccharide biosynthetic process          | 132   | 2.08E-14 | 2093       | 540      | 16709     | 2.49E-12  |
| GO:0007610--behavior                                     | 44    | 2.20E-13 | 2093       | 105      | 16709     | 2.40E-11  |
| GO:0042330--taxis                                        | 44    | 2.20E-13 | 2093       | 105      | 16709     | 2.40E-11  |
| GO:0007626--locomotory behavior                          | 44    | 2.20E-13 | 2093       | 105      | 16709     | 2.40E-11  |
| GO:0006023--aminoglycan biosynthetic process             | 38    | 4.52E-13 | 2093       | 83       | 16709     | 4.52E-11  |
| GO:0009252--peptidoglycan biosynthetic process           | 38    | 4.52E-13 | 2093       | 83       | 16709     | 4.52E-11  |
| GO:0006024--glycosaminoglycan biosynthetic process       | 38    | 4.52E-13 | 2093       | 83       | 16709     | 4.52E-11  |
| GO:0010382--cellular cell wall macromolecule metabolic   | 39    | 4.82E-13 | 2093       | 87       | 16709     | 4.45E-11  |
| GO:0070589--cellular component macromolecule biosyn      | 38    | 1.71E-12 | 2093       | 86       | 16709     | 1.47E-10  |
| GO:0044038--cell wall macromolecule biosynthetic proce   | 38    | 1.71E-12 | 2093       | 86       | 16709     | 1.47E-10  |
| GO:0005976--polysaccharide metabolic process             | 155   | 2.63E-12 | 2093       | 712      | 16709     | 2.11E-10  |
| GO:0006091--generation of precursor metabolites and er   | 158   | 1.54E-11 | 2093       | 746      | 16709     | 1.16E-09  |
| GO:0015980--energy derivation by oxidation of organic cc | 102   | 2.77E-11 | 2093       | 418      | 16709     | 1.96E-09  |
| GO:0030258--lipid modification                           | 21    | 4.14E-11 | 2093       | 32       | 16709     | 2.76E-09  |
| GO:0009273--peptidoglycan-based cell wall biogenesis     | 38    | 4.16E-11 | 2093       | 94       | 16709     | 2.63E-09  |
| GO:0042546--cell wall biogenesis                         | 38    | 4.16E-11 | 2093       | 94       | 16709     | 2.63E-09  |
| GO:0019395--fatty acid oxidation                         | 20    | 9.16E-11 | 2093       | 30       | 16709     | 5.50E-09  |
| GO:0034440--lipid oxidation                              | 20    | 9.16E-11 | 2093       | 30       | 16709     | 5.50E-09  |
| GO:0018130--heterocycle biosynthetic process             | 98    | 1.55E-10 | 2093       | 407      | 16709     | 8.85E-09  |
| GO:0046377--colanic acid metabolic process               | 19    | 2.01E-10 | 2093       | 28       | 16709     | 1.10E-08  |
| GO:0009242--colanic acid biosynthetic process            | 19    | 2.01E-10 | 2093       | 28       | 16709     | 1.10E-08  |
| GO:0034654--nucleobase, nucleoside, nucleotide and nu    | 84    | 2.04E-10 | 2093       | 330      | 16709     | 1.07E-08  |
| GO:0034404--nucleobase, nucleoside and nucleotide bio    | 84    | 2.04E-10 | 2093       | 330      | 16709     | 1.07E-08  |
| GO:0045333--cellular respiration                         | 91    | 2.67E-10 | 2093       | 371      | 16709     | 1.33E-08  |
| GO:0006766--vitamin metabolic process                    | 80    | 3.97E-10 | 2093       | 312      | 16709     | 1.90E-08  |
| GO:0009108--coenzyme biosynthetic process                | 72    | 8.80E-10 | 2093       | 273      | 16709     | 4.06E-08  |
| GO:0009116--nucleoside metabolic process                 | 47    | 9.91E-10 | 2093       | 145      | 16709     | 4.40E-08  |
| GO:0006790--sulfur metabolic process                     | 70    | 1.44E-09 | 2093       | 265      | 16709     | 6.16E-08  |
| GO:0006767--water-soluble vitamin metabolic process      | 72    | 1.47E-09 | 2093       | 276      | 16709     | 6.07E-08  |
| GO:0009084--glutamine family amino acid biosynthetic pi  | 40    | 2.18E-09 | 2093       | 115      | 16709     | 8.70E-08  |
| GO:0051188--cofactor biosynthetic process                | 102   | 2.82E-09 | 2093       | 452      | 16709     | 1.09E-07  |
| GO:0009110--vitamin biosynthetic process                 | 72    | 2.85E-09 | 2093       | 280      | 16709     | 1.07E-07  |
| GO:0051186--cofactor metabolic process                   | 139   | 5.08E-09 | 2093       | 684      | 16709     | 1.85E-07  |
| GO:0042364--water-soluble vitamin biosynthetic process   | 64    | 1.05E-08 | 2093       | 244      | 16709     | 3.70E-07  |
| GO:0034637--cellular carbohydrate biosynthetic process   | 105   | 1.06E-08 | 2093       | 481      | 16709     | 3.64E-07  |
| GO:0042493--response to drug                             | 48    | 1.32E-08 | 2093       | 161      | 16709     | 4.39E-07  |
| GO:0006732--coenzyme metabolic process                   | 102   | 1.91E-08 | 2093       | 468      | 16709     | 6.19E-07  |
| GO:0019438--aromatic compound biosynthetic process       | 56    | 2.15E-08 | 2093       | 205      | 16709     | 6.78E-07  |
| GO:0009066--aspartate family amino acid metabolic proc   | 37    | 1.19E-07 | 2093       | 116      | 16709     | 3.66E-06  |
| GO:0008610--lipid biosynthetic process                   | 104   | 1.32E-07 | 2093       | 498      | 16709     | 3.97E-06  |
| GO:0009165--nucleotide biosynthetic process              | 64    | 1.34E-07 | 2093       | 260      | 16709     | 3.92E-06  |
| GO:0009628--response to abiotic stimulus                 | 33    | 1.61E-07 | 2093       | 98       | 16709     | 4.59E-06  |
| GO:0009243--O antigen biosynthetic process               | 11    | 1.85E-07 | 2093       | 13       | 16709     | 5.17E-06  |
| GO:0046402--O antigen metabolic process                  | 11    | 1.85E-07 | 2093       | 13       | 16709     | 5.17E-06  |
| GO:0033692--cellular polysaccharide biosynthetic proces  | 88    | 2.55E-07 | 2093       | 406      | 16709     | 6.95E-06  |
| GO:0046128--purine ribonucleoside metabolic process      | 30    | 2.79E-07 | 2093       | 86       | 16709     | 7.45E-06  |
| GO:0006308--DNA catabolic process                        | 18    | 3.49E-07 | 2093       | 36       | 16709     | 9.09E-06  |
| GO:0009119--ribonucleoside metabolic process             | 34    | 3.64E-07 | 2093       | 106      | 16709     | 9.30E-06  |
| GO:0042278--purine nucleoside metabolic process          | 30    | 3.69E-07 | 2093       | 87       | 16709     | 9.23E-06  |
| GO:0044264--cellular polysaccharide metabolic process    | 91    | 4.78E-07 | 2093       | 430      | 16709     | 1.17E-05  |
| GO:0006928--cell motion                                  | 23    | 5.45E-07 | 2093       | 57       | 16709     | 1.31E-05  |
| GO:0034660--ncRNA metabolic process                      | 82    | 5.88E-07 | 2093       | 377      | 16709     | 1.38E-05  |
| GO:0006457--protein folding                              | 52    | 7.48E-07 | 2093       | 204      | 16709     | 1.73E-05  |
| GO:0009067--aspartate family amino acid biosynthetic pr  | 35    | 7.49E-07 | 2093       | 114      | 16709     | 1.70E-05  |
| GO:0044265--cellular macromolecule catabolic process     | 27    | 1.11E-06 | 2093       | 77       | 16709     | 2.46E-05  |

|                                                          |     |          |      |      |       |          |
|----------------------------------------------------------|-----|----------|------|------|-------|----------|
| GO:0008360~regulation of cell shape                      | 29  | 1.30E-06 | 2093 | 87   | 16709 | 2.85E-05 |
| GO:0022604~regulation of cell morphogenesis              | 29  | 1.30E-06 | 2093 | 87   | 16709 | 2.85E-05 |
| GO:0006631~fatty acid metabolic process                  | 36  | 1.42E-06 | 2093 | 122  | 16709 | 3.05E-05 |
| GO:0022900~electron transport chain                      | 72  | 1.53E-06 | 2093 | 325  | 16709 | 3.22E-05 |
| GO:0048870~cell motility                                 | 22  | 1.71E-06 | 2093 | 56   | 16709 | 3.54E-05 |
| GO:0001539~ciliary or flagellar motility                 | 22  | 1.71E-06 | 2093 | 56   | 16709 | 3.54E-05 |
| GO:0051674~localization of cell                          | 22  | 1.71E-06 | 2093 | 56   | 16709 | 3.54E-05 |
| GO:0009432~SOS response                                  | 23  | 2.87E-06 | 2093 | 62   | 16709 | 5.83E-05 |
| GO:0006113~fermentation                                  | 19  | 3.18E-06 | 2093 | 45   | 16709 | 6.36E-05 |
| GO:0006220~pyrimidine nucleotide metabolic process       | 20  | 4.21E-06 | 2093 | 50   | 16709 | 8.29E-05 |
| GO:0009991~response to extracellular stimulus            | 35  | 6.03E-06 | 2093 | 124  | 16709 | 1.17E-04 |
| GO:0044272~sulfur compound biosynthetic process          | 47  | 6.47E-06 | 2093 | 190  | 16709 | 1.23E-04 |
| GO:0042398~cellular amino acid derivative biosynthetic p | 33  | 6.57E-06 | 2093 | 114  | 16709 | 1.23E-04 |
| GO:0009103~lipopolysaccharide biosynthetic process       | 68  | 7.74E-06 | 2093 | 315  | 16709 | 1.43E-04 |
| GO:0009226~nucleotide-sugar biosynthetic process         | 10  | 8.23E-06 | 2093 | 14   | 16709 | 1.50E-04 |
| GO:0042558~pteridine and derivative metabolic process    | 26  | 8.55E-06 | 2093 | 80   | 16709 | 1.53E-04 |
| GO:0042559~pteridine and derivative biosynthetic proces  | 26  | 8.55E-06 | 2093 | 80   | 16709 | 1.53E-04 |
| GO:0006221~pyrimidine nucleotide biosynthetic process    | 19  | 9.34E-06 | 2093 | 48   | 16709 | 1.65E-04 |
| GO:0006261~DNA-dependent DNA replication                 | 38  | 1.03E-05 | 2093 | 143  | 16709 | 1.80E-04 |
| GO:0008653~lipopolysaccharide metabolic process          | 69  | 1.06E-05 | 2093 | 324  | 16709 | 1.82E-04 |
| GO:0006399~tRNA metabolic process                        | 59  | 1.61E-05 | 2093 | 267  | 16709 | 2.72E-04 |
| GO:0006022~aminoglycan metabolic process                 | 51  | 2.21E-05 | 2093 | 222  | 16709 | 3.68E-04 |
| GO:0030203~glycosaminoglycan metabolic process           | 50  | 2.47E-05 | 2093 | 217  | 16709 | 4.06E-04 |
| GO:0000270~peptidoglycan metabolic process               | 50  | 2.47E-05 | 2093 | 217  | 16709 | 4.06E-04 |
| GO:0007049~cell cycle                                    | 37  | 2.58E-05 | 2093 | 143  | 16709 | 4.18E-04 |
| GO:0009415~response to water                             | 8   | 4.06E-05 | 2093 | 10   | 16709 | 6.49E-04 |
| GO:0009414~response to water deprivation                 | 8   | 4.06E-05 | 2093 | 10   | 16709 | 6.49E-04 |
| GO:0009269~response to desiccation                       | 8   | 4.06E-05 | 2093 | 10   | 16709 | 6.49E-04 |
| GO:0009451~RNA modification                              | 45  | 4.32E-05 | 2093 | 192  | 16709 | 6.81E-04 |
| GO:0000041~transition metal ion transport                | 47  | 5.77E-05 | 2093 | 206  | 16709 | 8.99E-04 |
| GO:0000097~sulfur amino acid biosynthetic process        | 23  | 6.83E-05 | 2093 | 74   | 16709 | 0.001051 |
| GO:0009070~serine family amino acid biosynthetic proces  | 20  | 8.21E-05 | 2093 | 60   | 16709 | 0.001247 |
| GO:0015837~amine transport                               | 62  | 8.59E-05 | 2093 | 301  | 16709 | 0.001288 |
| GO:0009101~glycoprotein biosynthetic process             | 9   | 8.88E-05 | 2093 | 14   | 16709 | 0.001314 |
| GO:0009100~glycoprotein metabolic process                | 9   | 8.88E-05 | 2093 | 14   | 16709 | 0.001314 |
| GO:0055114~oxidation reduction                           | 310 | 8.94E-05 | 2093 | 2037 | 16709 | 0.001307 |
| GO:0042401~biogenic amine biosynthetic process           | 23  | 1.06E-04 | 2093 | 76   | 16709 | 0.001533 |
| GO:0009310~amine catabolic process                       | 44  | 1.34E-04 | 2093 | 195  | 16709 | 0.001909 |
| GO:0009064~glutamine family amino acid metabolic proc    | 55  | 1.36E-04 | 2093 | 262  | 16709 | 0.001913 |
| GO:0034470~ncRNA processing                              | 61  | 1.43E-04 | 2093 | 300  | 16709 | 0.001997 |
| GO:0009435~NAD biosynthetic process                      | 14  | 1.82E-04 | 2093 | 35   | 16709 | 0.002501 |
| GO:0019359~nicotinamide nucleotide biosynthetic proces   | 14  | 1.82E-04 | 2093 | 35   | 16709 | 0.002501 |
| GO:0006596~polyamine biosynthetic process                | 14  | 1.82E-04 | 2093 | 35   | 16709 | 0.002501 |
| GO:0019674~NAD metabolic process                         | 14  | 1.82E-04 | 2093 | 35   | 16709 | 0.002501 |
| GO:0019363~pyridine nucleotide biosynthetic process      | 15  | 2.15E-04 | 2093 | 40   | 16709 | 0.002928 |
| GO:0033865~nucleoside bisphosphate metabolic proces      | 12  | 2.20E-04 | 2093 | 27   | 16709 | 0.002961 |
| GO:0046942~carboxylic acid transport                     | 77  | 2.42E-04 | 2093 | 409  | 16709 | 0.003216 |
| GO:0015849~organic acid transport                        | 77  | 2.42E-04 | 2093 | 409  | 16709 | 0.003216 |
| GO:0006865~amino acid transport                          | 57  | 2.58E-04 | 2093 | 281  | 16709 | 0.003397 |
| GO:0019521~D-gluconate metabolic process                 | 9   | 3.02E-04 | 2093 | 16   | 16709 | 0.003926 |
| GO:0019520~aldonic acid metabolic process                | 9   | 3.02E-04 | 2093 | 16   | 16709 | 0.003926 |
| GO:0000096~sulfur amino acid metabolic process           | 24  | 3.30E-04 | 2093 | 87   | 16709 | 0.004254 |
| GO:0017004~cytochrome complex assembly                   | 19  | 3.38E-04 | 2093 | 61   | 16709 | 0.004302 |
| GO:0015936~coenzyme A metabolic process                  | 10  | 3.41E-04 | 2093 | 20   | 16709 | 0.004294 |
| GO:0015937~coenzyme A biosynthetic process               | 10  | 3.41E-04 | 2093 | 20   | 16709 | 0.004294 |
| GO:0006811~ion transport                                 | 141 | 3.53E-04 | 2093 | 851  | 16709 | 0.004399 |
| GO:0034621~cellular macromolecular complex subunit c     | 26  | 3.99E-04 | 2093 | 99   | 16709 | 0.004926 |
| GO:0006575~cellular amino acid derivative metabolic pr   | 46  | 4.09E-04 | 2093 | 217  | 16709 | 0.004998 |
| GO:0016042~lipid catabolic process                       | 8   | 4.11E-04 | 2093 | 13   | 16709 | 0.004974 |
| GO:0006071~glycerol metabolic process                    | 17  | 4.23E-04 | 2093 | 52   | 16709 | 0.005069 |
| GO:0006733~oxidoreduction coenzyme metabolic proces      | 35  | 4.30E-04 | 2093 | 151  | 16709 | 0.005093 |
| GO:0046349~amino sugar biosynthetic process              | 10  | 5.30E-04 | 2093 | 21   | 16709 | 0.006219 |
| GO:0009112~nucleobase metabolic process                  | 29  | 6.39E-04 | 2093 | 119  | 16709 | 0.007423 |
| GO:0006396~RNA processing                                | 68  | 6.60E-04 | 2093 | 363  | 16709 | 0.007592 |
| GO:0044036~cell wall macromolecule metabolic process     | 50  | 6.74E-04 | 2093 | 247  | 16709 | 0.007675 |

## 5. Identification of transcripts mostly contributing to the process of transformation

In order to analyse the transcripts strongly contributing to the major transcription pattern during process of transformation, we examine the change in the expression level between two time points. From equation [1] in the main text and noting that  $G_{i\alpha}$ , the weight of a transcript in the pattern  $\alpha$  is not dependent on time, we calculate that:

$$\ln(X_i(t_T)) - \ln(X_i(t_{T'})) = -\sum_{\alpha=1} G_{i\alpha} (\lambda_{\alpha}(t_T) - \lambda_{\alpha}(t_{T'}))$$

The sign of  $G_{i\alpha}$ , the extent of participation of the transcript  $i$  in the pattern  $\alpha$  can be either positive or negative (3, 4). Therefore in the same phenotype some transcripts in the pattern can be reduced while other can be induced and the surprisal analysis predicts which one does what (For examples see (3, 4)). HF1 model transformation system has 4 continuous time points in the transformation route ( K-normal cells, E-HPV16 immortalized cells at early stages, L- HPV16 immortalized cells at late stages, BP- benzo(a)pyren treated L cells, that able to form colonies in soft agar). The major transcription pattern switched its sign between E and L time points. That means that the transcripts contributing to the early stages of transformation have a smaller contribution in the late stages of transformation and vice versa. For the analysis of the major transcription pattern in the HF1 transformation model we looked at 4647 transcripts (out of 22250) that mostly contributed , negatively and positively, to the major transcription pattern in the process of transformation and have a significant absolute dln value:  $\ln(X_{i(BP)}) - \ln(X_{i(K)}) \geq 1$ .

TGF $\beta$  treated lung cancer cells (A549) have 9 continuous time points in the process of metastasis (the cells were treated by TGF $\beta$  for 0.5, 1, 2,4,8,16,24 and 72 hours). The major transcription pattern switched its sign between 4 and 8 hours. For the analysis of the major transcription pattern in the TGF $\beta$  treated lung cancer cells we looked at 3416 transcripts (out of 54700) that mostly contributed , negatively and positively, to the major transcription pattern in the process of transformation and have a significant absolute dln value.  $\ln(X_{i(72h)}) - \ln(X_{i(0h)}) \geq 0.7$



## 6. Stable transcripts of the steady state participate less in the process of transformation

Examination of the transcripts that contribute significantly (transcripts with the highest  $G_{i1}\lambda_1$  (or  $G_{i1}$ ) values), positively or negatively, to the major transcription pattern ( $\alpha = 1$ ) during the transformation of HF1 cells revealed the majority of these transcripts have middle or high free energy values. Out of a total of  $\sim 22200$  transcripts, 4647 have a non negligible weight,  $G_{i1}$  in the major transcription pattern. Of those, only 300 transcripts are also present in the core set of the steady state. (low  $G_{i0}$  value ( $< -0.01$ )). It is still however the case that because  $\lambda_1 \ll \lambda_0$  the work done by the process hardly changes the free energy. About 1400 transcripts that belong to the  $\alpha = 1$  pattern have a mid  $G_{i0}$  value (greater than  $-0.01$  and less than  $-0.006$ , Fig. S6) and belong mostly to cell cycle process (Fig. S6, Table S17), while the transcripts in  $\alpha = 1$  present in the steady state with the highest  $G_{i0}$  (greater than  $-0.006$ ) belong to signal transduction, cell communication and morphogenesis categories (Table S18). The same results were obtained from the analysis of the TGF $\beta$  treated cells, the renal carcinoma metastasis model and fibroblast cancer model WI-38.

## **Experimental studies used in the manuscript:**

### **1. WI-38 transformed fibroblasts (7):**

The cancer model system follows the progression from the normal phenotype all the way to the onset of cancer. The WI-38 cellular system includes parental WI-38 fibroblasts in the young, senescent stages as well as the hTERT immortalized cells at the different stages. At a certain stage (Figure 1), p53 was inactivated by the expression of a dominant-negative peptide GSE56, and the expression of oncogenic H-Ras was induced by infection at the indicated time points as shown in Figure 1. The genetic alterations were applied at different points as shown in Figure 1 where the time points are labeled  $T = 1, 2, \dots, 12$ . It is important to note that different trajectories of the transformation process go through different time points. For example, we will compare the three trajectories 1-5-7-8-9, 1-5-7-8-11 and 1-5-7-8-10-12, which share a common process up to and including point 8. These are all continuous processes where each time point follows the preceding one and we will refer to such a sequence of stages as a trajectory. An opposite example is the trajectory 1-5-6-7 that cannot be considered as continuous since time point 7 does not experimentally follow point 6.

### **2. TGF $\beta$ treated lung cancer cells (8):**

The goal of the experiment is to profile temporal gene expression changes during TGF-beta-induced epithelial-mesenchymal transition (EMT). During EMT cancer cells lose their epithelial specific proteins and gain mesenchymal proteins to acquire migratory and invasive phenotype essential for metastasis. Human A549 lung adenocarcinoma cell line was treated with 5 ng/mL TGF-beta for 0, 0.5, 1, 2, 4, 8, 16, 24, and 72 h to induce EMT. The experiment was repeated 3 times. Samples were assayed using Affymetrix HG\_U133\_plus\_2 arrays with 54675 probe-sets, using standard techniques.

### **3. Colon carcinoma development (9):**

Paired tissues (normal colon, primary colorectal carcinoma, normal liver, liver metastasis of colorectal carcinoma) from 2 colorectal carcinoma patients in Taiwan were processed to generate total RNA, which was subsequently analyzed for gene expression using Affymetrix U133 plus 2.0 arrays.

#### **4. Renal carcinoma development from (10):**

In this study primary tumor, normal tissue and metastases with the aim of identifying similarities and differences between these tissues were compared. This comparison was performed for three patients on the level of the transcriptome using oligonucleotide microarrays. The quantitative results show that primary tumor is more similar to metastasis than to normal tissue, both on the level of HLA ligand presentation and mRNA.

#### **5. Prostate cancer development:**

Prostates taken from radical prostatectomy surgeries from 4 different patients (for removal of diseased tissue) were separated by a Urologic Pathologist into cancer and benign adjacent to cancer. Cancer and benign adjacent to cancer tissues were dissociated to single cells and highly purified populations of benign basal epithelial cells, benign luminal epithelial cells, and cancerous luminal cells were isolated by Fluorescence Activated Cell Sorting for subsequent RNA isolation and microarray analysis.

Gene expression in three epithelial cell-types, representing two stages of disease of prostate cancer, was examined using Human Genome U133 Plus 2.0 array. Basal cells represent the stem-like cell compartment in the benign epithelium of the prostate and are also cells-of-origin for prostate cancer. Luminal cells represent the mature compartment in benign prostate epithelium. Both basal cells and luminal cells were taken from benign tissues adjacent to cancer that were carefully separated from tumor under the guidance of the Urologic Pathologist following radical prostatectomy for removal of diseased prostate tissue. Cancer cells represent highly purified preparations of luminal cells taken from cancer glands in the prostate.

#### **6. HPV16 transformed keratinocytes (11):**

**To identify early processes in carcinogenesis, we used an in vitro model, based on the** initiating event in cervical cancer, human papillomavirus (HPV) transformation of keratinocytes. We compared gene expression in primary keratinocytes (K) and HPV16-transformed keratinocytes from early (E) and late (L) passages, and from benzo[a]pyrene treated L cells (BP). The transformed cells exhibit similar

transcriptional changes to clinical cervical carcinoma. We revealed a contraction in expression of the apoptotic network during HF1 cell transformation, which affected the ability of L and BP cells to execute apoptosis, but did not lead to resistance to apoptotic stimuli. The contraction in the apoptotic machinery during the process of transformation was accompanied by a switch from apoptosis to necrosis in response to CDDP. The shrinkage of the pro- and anti-apoptotic networks appears to be part of a general contraction in the number of genes transcribed in L and BP cells. We also identified a large group of genes with induced expression, which are involved in cell metabolism and cell cycle, suggesting increased investment of the transformed cell in cellular proliferation.

#### **7. TGF $\beta$ treated hematopoietic stem cells and dendritic differentiated cells (12):**

**Analysis of dendritic cells (DCs) and hematopoietic stem cells at various time points** up to 36 hours following treatment with TGF-beta1. DCs derived from CD34+ hematopoietic progenitor cells induced to differentiate in vitro. Results provide insight into the role of TGF-beta1 in DC development.

#### **8. Phenzine treated *S. cerevisiae* grown for 200 minutes (13):**

Perturbation of the gated-synchrony system in the budding yeast *Saccharomyces cerevisiae* with phenzine, an antidepressant drug used in the treatment of affective disorders in humans, leads to a rapid lengthening in the period of the genome-wide transcriptional oscillation. Samples for Affymetrix expression array analysis were taken at 4-min intervals through four cycles of the oscillation. After one complete cycle of sampling, PZ was added at 1 mM at the different time points. Transcripts were classed according to their time of maximum expression in the cycle by scaling expression to the average of the first 10 samples (control cycle).

#### **9. Development of carcinoma 31 mice (14):**

Using an integrated linkage and genomic analysis of a mouse model of skin cancer that produces both benign tumors and malignant carcinomas, major changes in

germline control of gene expression during skin tumor development resulting from cell selection, somatic genetic events, and changes in the tumor microenvironment were documented. The number of significant expression Quantitative Trait Loci (eQTLs) is progressively reduced in benign and malignant skin tumors when compared to normal skin. However, novel tumor-specific eQTLs are detected for several genes associated with tumor susceptibility, including Interleukin 18, Granzyme E, Sprouty homolog 2, and MAP kinase kinase 4. Conclusions: the genetic architecture is substantially altered in tumors, and that eQTL analysis of tumors can identify host factors that influence the tumor microenvironment, MAP kinase signaling, and cancer susceptibility.

**10. E. Coli grown on biofilms for 24 hours (15):**

Analysis of Escherichia coli K-12 biofilms up to 24 hours of culturing. Biofilm bacteria predominate in nutrient-sufficient ecosystems. Temporal expression of biofilm and suspension samples from E. coli wild type cultured on glass wool in LB medium. Samples removed after 4, 7, 15, and 24 hr of culturing. Results provide insight into the molecular mechanisms underlying biofilm development.

## 8. References

1. Laidler K (1996) A glossary of terms used in chemical kinetics, including reaction dynamics (IUPAC Recommendations 1996). *Pure & Appl. Chem* 68:149-192.
2. Levine RD (2005) *Molecular Reaction Dynamics* (Cambridge: The University Press).
3. Kravchenko-Balasha N, Remacle F, Gross A, Rotter V, Levitzki A, et al. (2011) Convergence of logic of cellular regulation in different premalignant cells by an information theoretic approach. *BMC Syst Biol* 5:42.
4. Remacle F, Kravchenko-Balasha N, Levitzki A, & Levine RD (2010) Information-theoretic analysis of phenotype changes in early stages of carcinogenesis. *Proc Natl Acad Sci USA* 107(22):10324-10329.
5. Hosack DA, Dennis G, Jr., Sherman BT, Lane HC, & Lempicki RA (2003) Identifying biological themes within lists of genes with EASE. *Genome Biol* 4(10):R70.
6. Huang da W, Sherman BT, & Lempicki RA (2009) Systematic and integrative analysis of large gene lists using DAVID bioinformatics resources. *Nat Protoc* 4(1):44-57.
7. Milyavsky M, Tabach Y, Shats I, Erez N, Cohen Y, et al. (2005) Transcriptional programs following genetic alterations in p53, INK4A, and H-Ras genes along defined stages of malignant transformation. *Cancer Res* 65(11):4530-4543.
8. Sartor MA, Mahavisno V, Keshamouni VG, Cavalcoli J, Wright Z, et al. (2010) ConceptGen: a gene set enrichment and gene set relation mapping tool. *Bioinformatics* 26(4):456-463.
9. Wang H & Tsai C (2009) Comparison of gene expression profiles between paired primary and metastasis colorectal carcinoma. (GEO database).
10. Stickel JS, Weinzierl AO, Hillen N, Drews O, Schuler MM, et al. (2009) HLA ligand profiles of primary renal cell carcinoma maintained in metastases. *Cancer Immunol Immunother* 58(9):1407-1417.
11. Kravchenko-Balasha N, Mizrachy-Schwartz S, Klein S, & Levitzki A (2009) Shift from apoptotic to necrotic cell death during human papillomavirus-

- induced transformation of keratinocytes. *J Biol Chem* 284(17):11717-11727.
12. Ruau D, Ju XS, & Zenke M (2006) Genomics of TGF-beta1 signaling in stem cell commitment and dendritic cell development. *Cell Immunol* 244(2):116-120.
  13. Li CM & Klevecz RR (2006) A rapid genome-scale response of the transcriptional oscillator to perturbation reveals a period-doubling path to phenotypic change. *Proc Natl Acad Sci USA* 103(44):16254-16259.
  14. Quigley DA, To MD, Kim IJ, Lin KK, Albertson DG, et al. (2011) Network analysis of skin tumor progression identifies a rewired genetic architecture affecting inflammation and tumor susceptibility. *Genome Biol* 12(1):R5.
  15. Domka J, Lee J, Bansal T, & Wood TK (2007) Temporal gene-expression in Escherichia coli K-12 biofilms. *Environ Microbiol* 9(2):332-346.

Figure S1

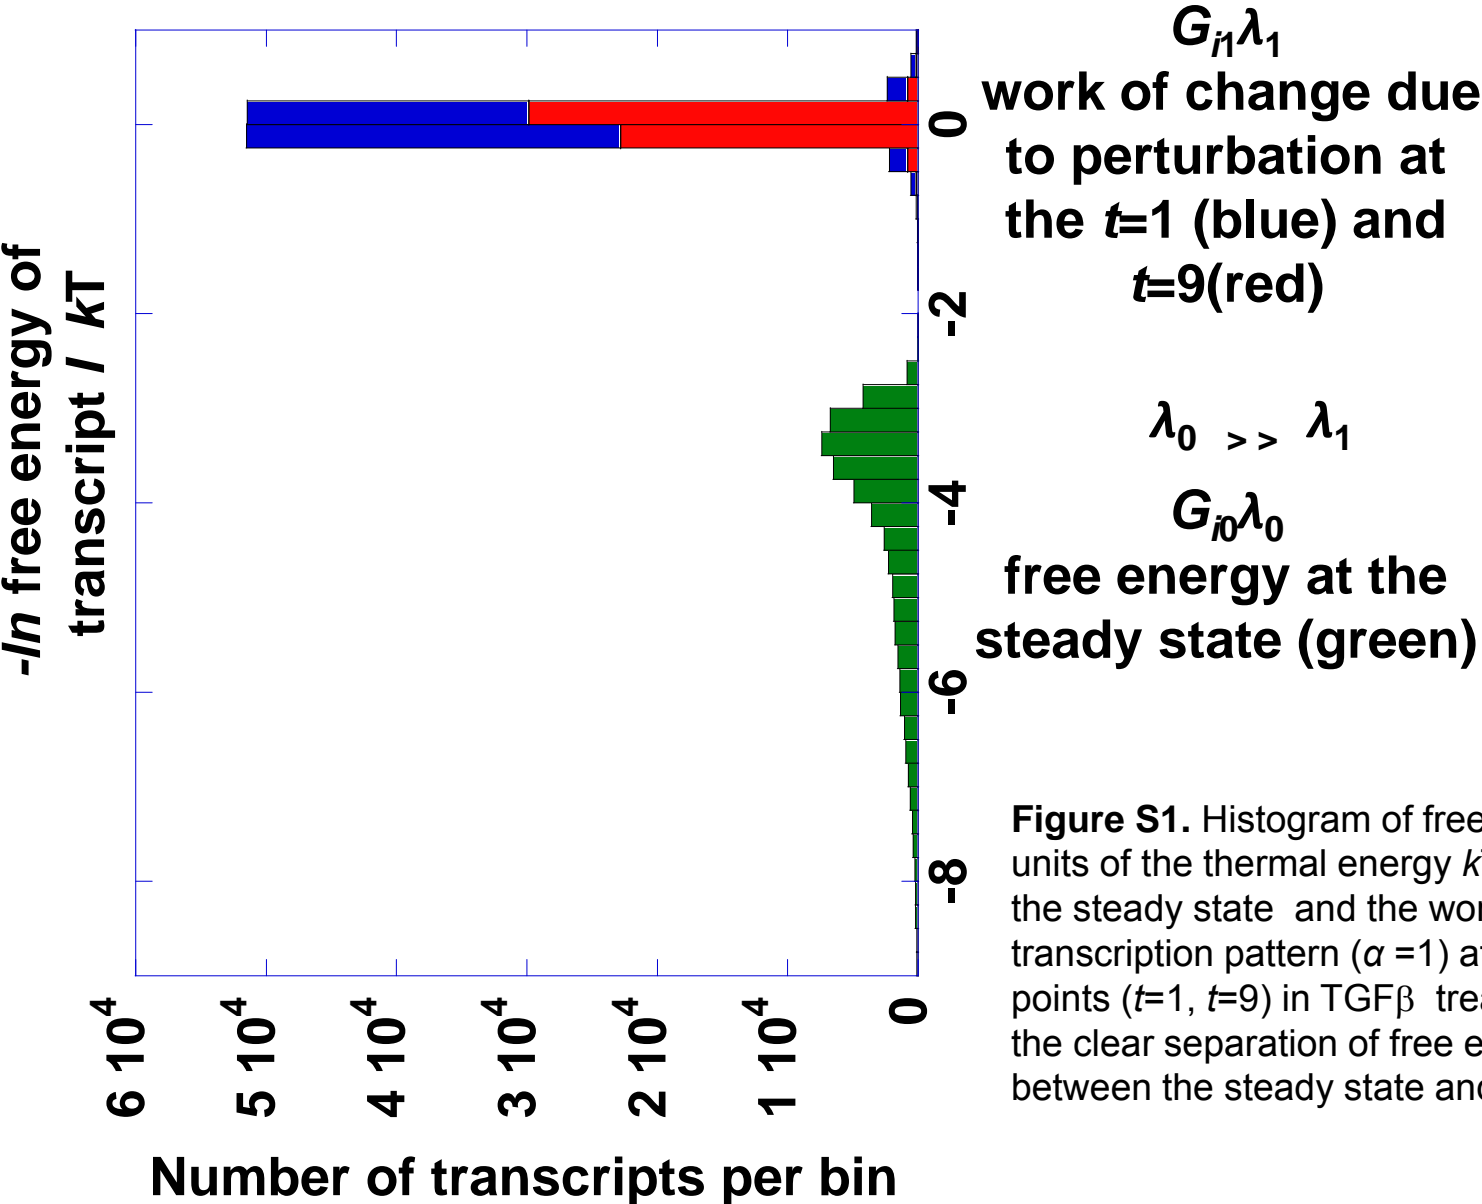

Figure S1. Histogram of free energy values, in units of the thermal energy  $kT$ , of the transcripts at the steady state and the work done by the major transcription pattern ( $\alpha = 1$ ) at two opposite time points ( $t=1, t=9$ ) in TGF $\beta$  treated A549 cells. Note the clear separation of free energy scales between the steady state and the perturbation..



Figure S2

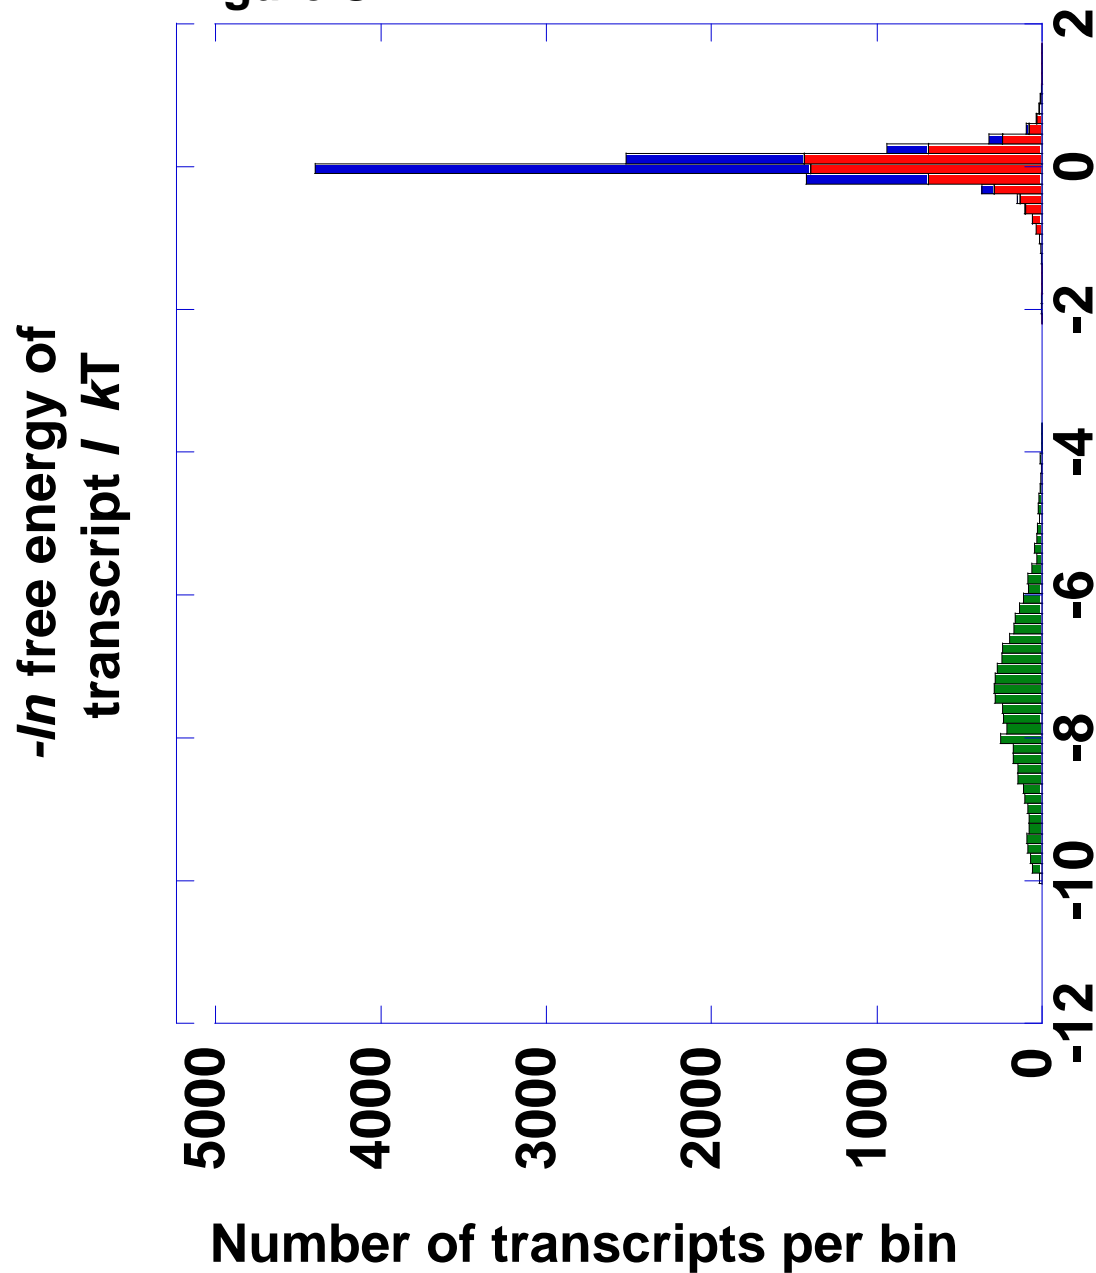

$G_{i1}\lambda_1$   
work of change due  
to perturbation the  
 $t=2$  (blue) and  
 $t=8$ (red)

$$\lambda_0 \gg \lambda_1$$

$G_{i0}\lambda_0$   
free energy at the  
steady state (green)

**Figure S2.** Histogram of free energy values, in units of the thermal energy  $kT$ , of the transcripts at the steady state and the work done by the major transcription pattern ( $\alpha = 1$ ) at two opposite time points ( $t=2$ ,  $t=8$ ) in yeast cells. Here too there is the clear separation of free energy scales between the steady state and the perturbation.

**Figure S3**

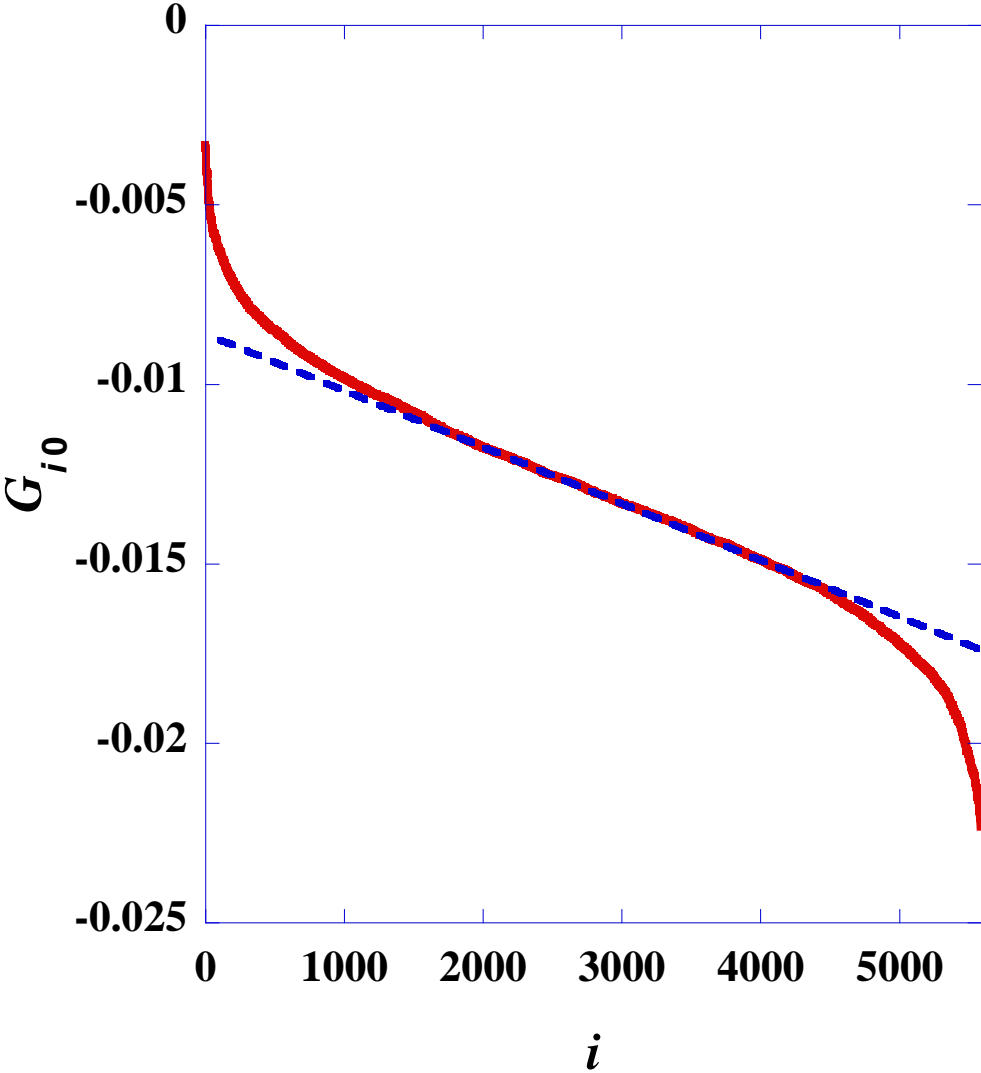

**Figure S3.**  $G_{i0}$  values sorted in decreasing magnitude vs. the transcript index determined in the cancer model system WI-38. The straight line is a fit to the linear part extended to the entire range emphasizing the rapidly varying entries at the two ends of the scale.

**Figure S4**

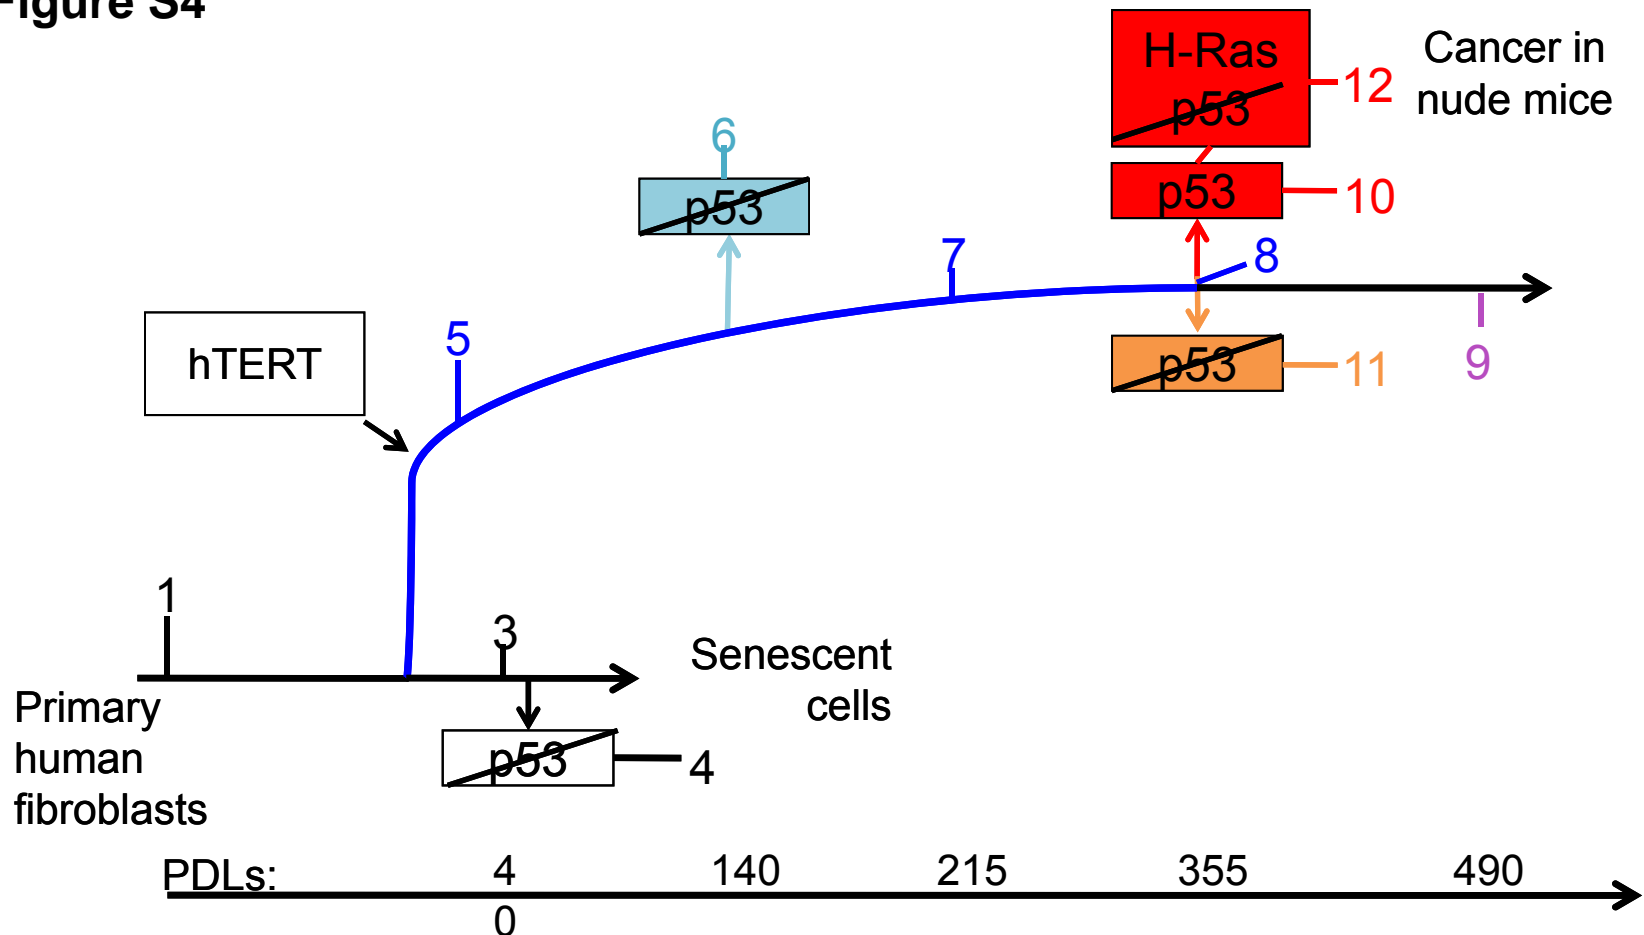

**Figure S4. Schematic representation of the WI-38 cell model (adapted from (3)).** Schematic representation of the physiological state (young, senescent, immortal, tumorigenic) and introduced modifications (hTERT, H-RAS, p53 inactivation) of the WI-38 cells along the process of malignant transformation. The stages chosen for the theoretical analyses can be arranged as several continuous trajectories where each sample follows the preceding one. A common route for many trajectories, the ones we highlight in the text, is represented by the blue color. The first branching occurs at the point 6 (pale blue) and generates the trajectory 156. The second branching occurs at the point 8 and generates 3 trajectories: 1-5-7-8-10-12 (red), 1-5-7-8-11 (yellow) and 1-5-7-8-9 (purple). There is an additional independent trajectory 1-3-4 (black). PDLs are the number of doublings since the cells primary isolation in vitro.

**Figure S5**

A

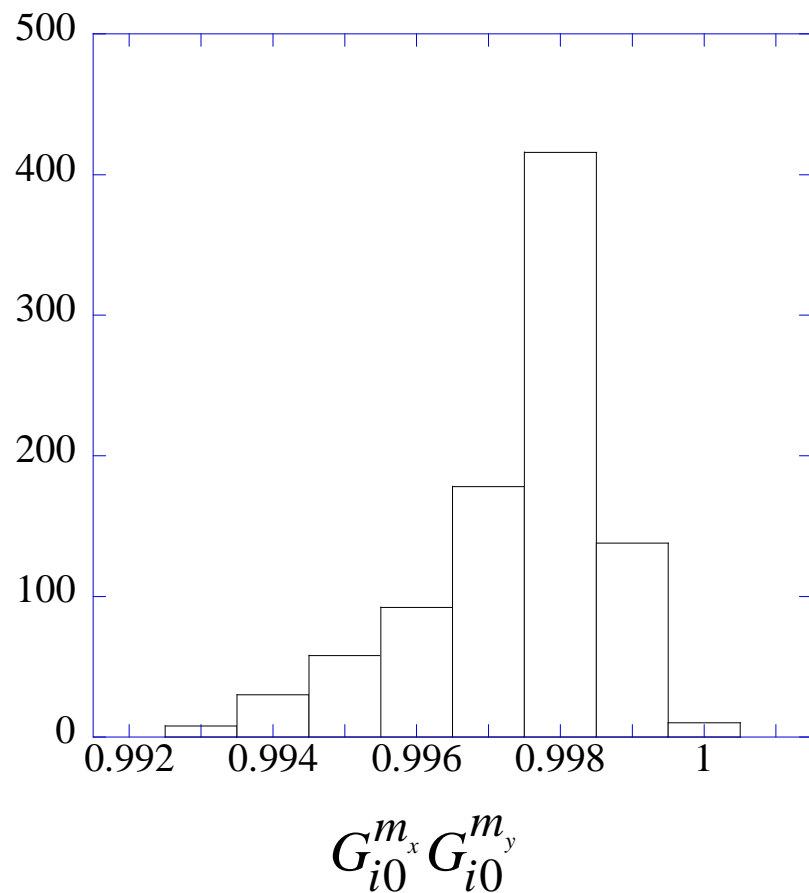

B

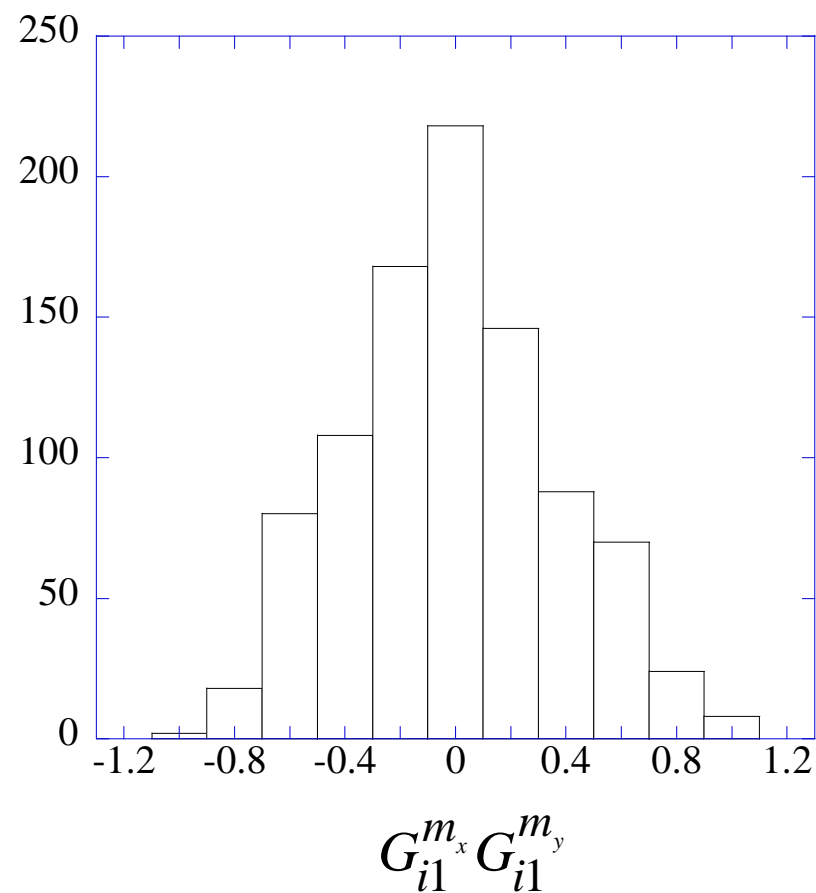

**Figure S5.** (A) Distribution of the scalar products  $G_{i0}^{m_x} G_{i0}^{m_y}$  for all mouse pairs among 31 mice. (B) Distribution of the scalar products  $G_{i1}^{m_x} G_{i1}^{m_y}$  for all mouse pairs.

Figure S6

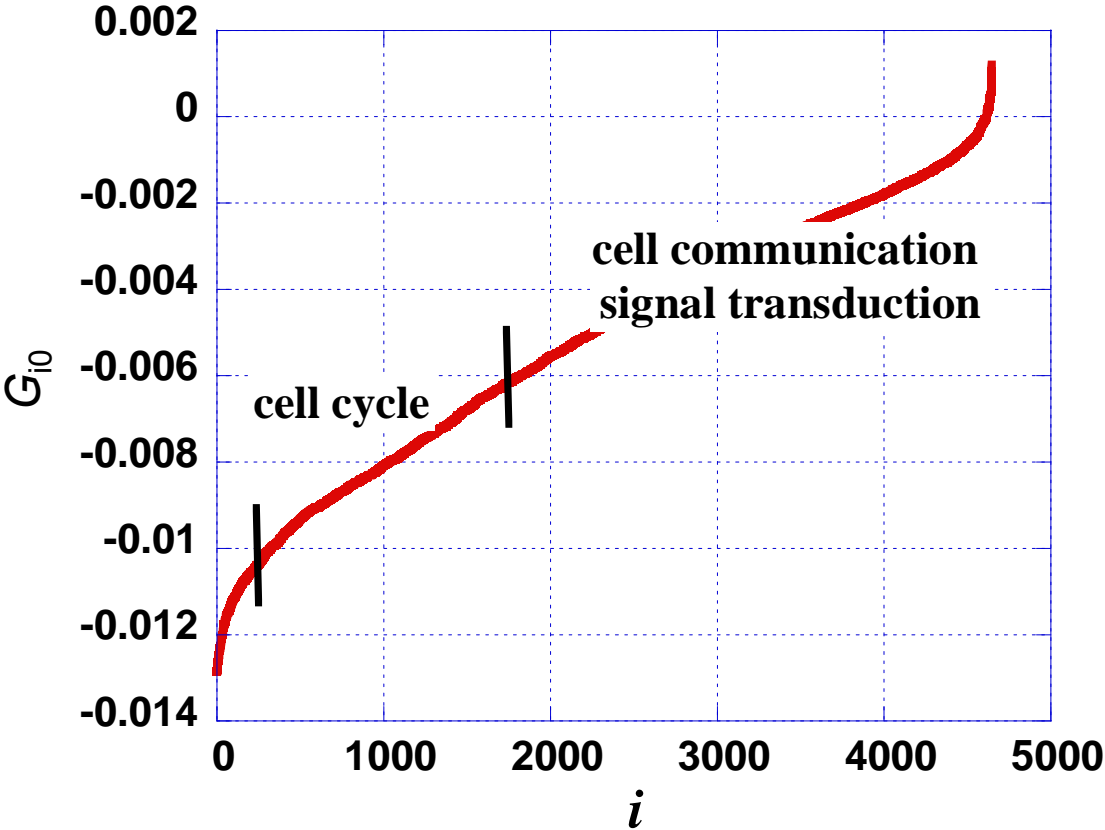

Figure S6.  $G_{10}$  distribution of the transcripts in the trajectory 15781012 of the cancer model system WI-38 strongly contributing to  $\alpha=1$ .

**Figure S7**

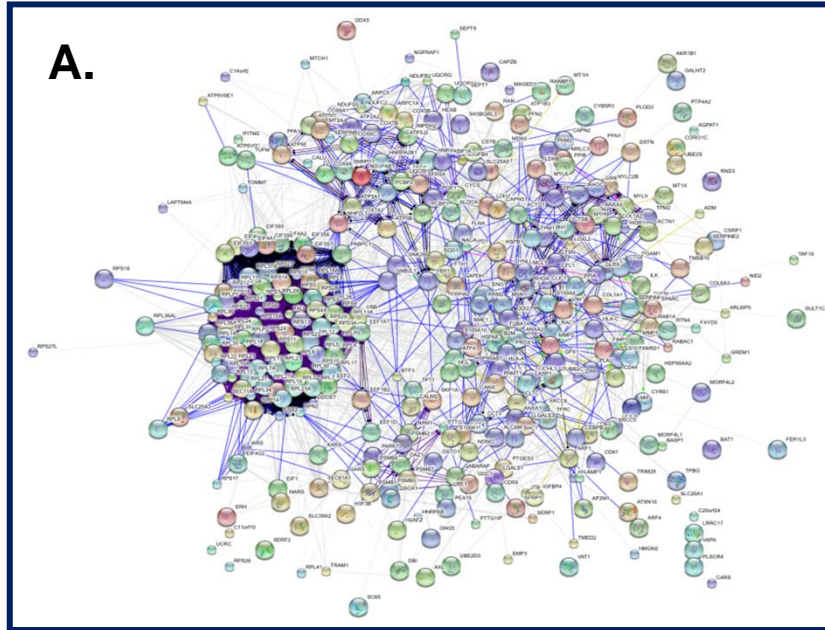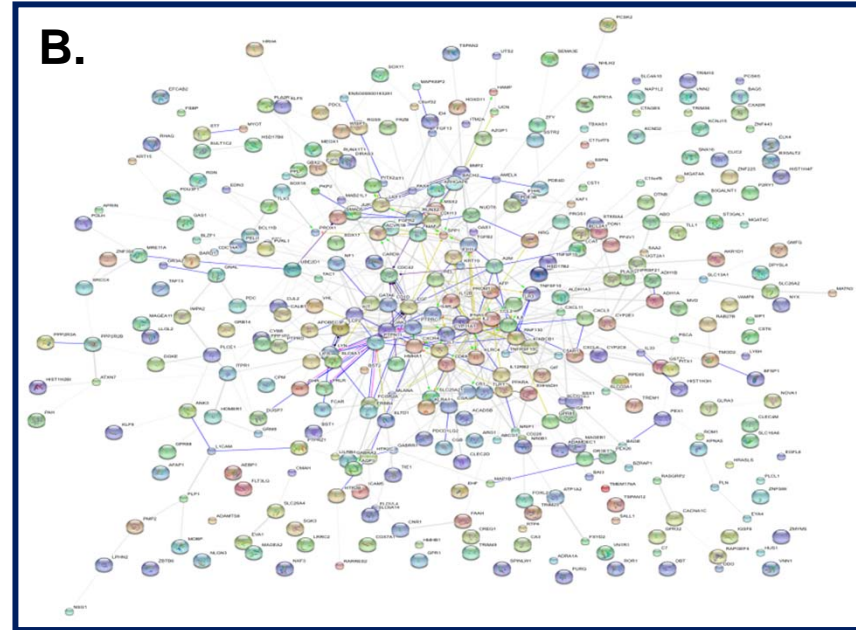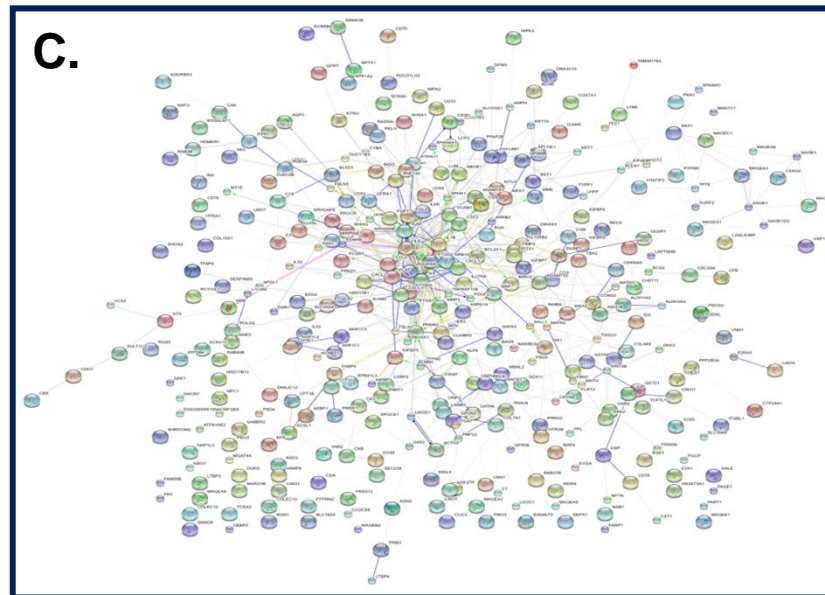

**Figure S7. Examination of the experimentally validated networks obtained from the values in the trajectory 15781012.** (A) 366 transcripts with the lowest, i.e., most stable,  $G_{i0}$  values (less than -0.018 according to Fig. S3). (B) 354 transcripts with the highest  $G_{i0}$  values (greater than -0.008, Fig. S3). (C) 366 transcripts with the biggest negative or positive  $G_{i1}$  values. The connections are as determined by the STRING software.

Figure S8

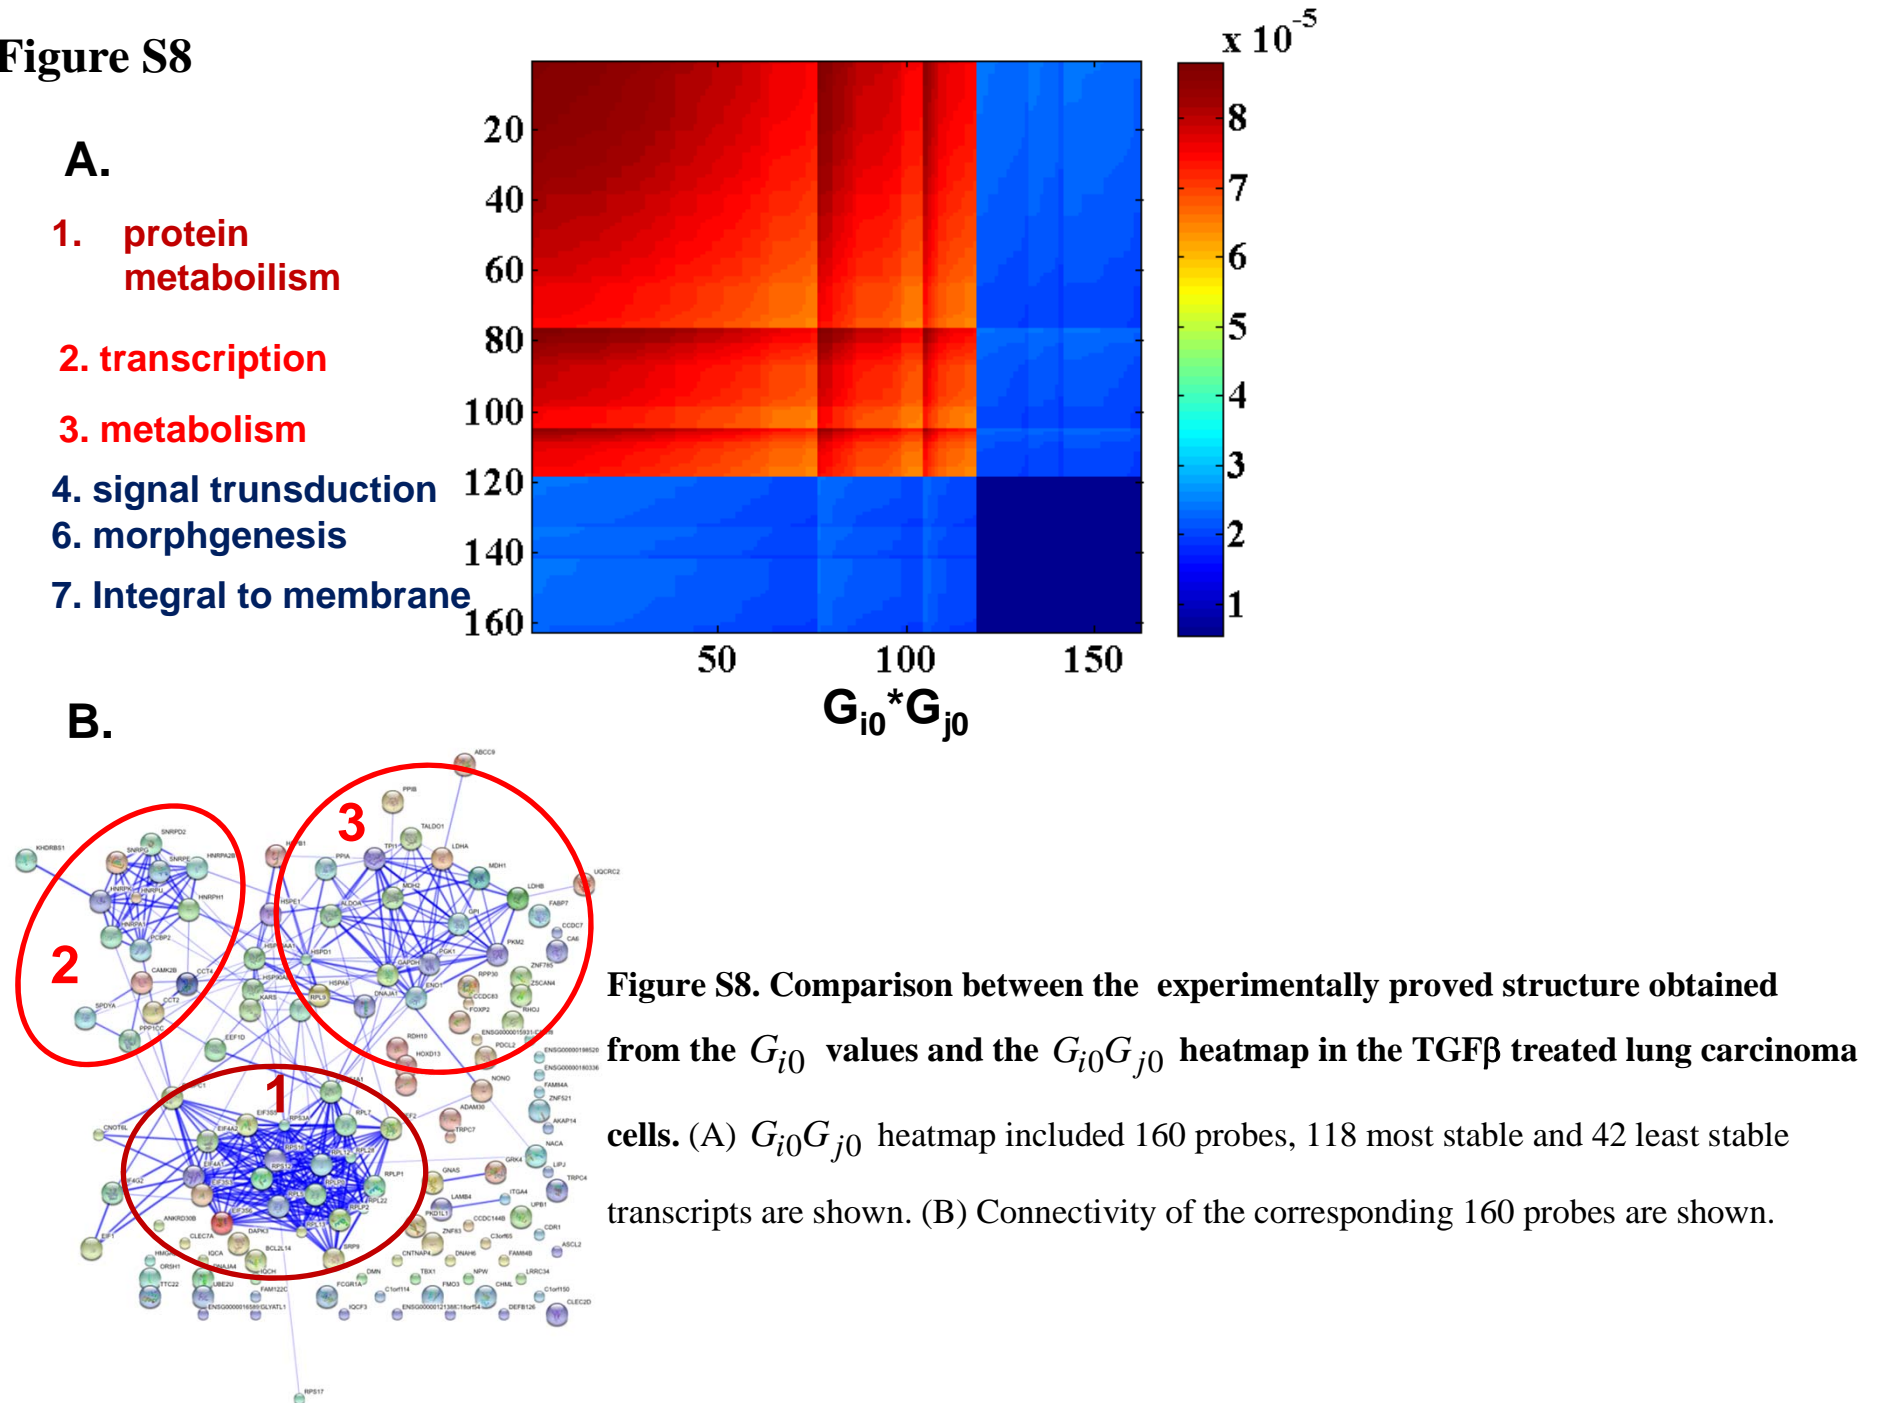

## Figure S9

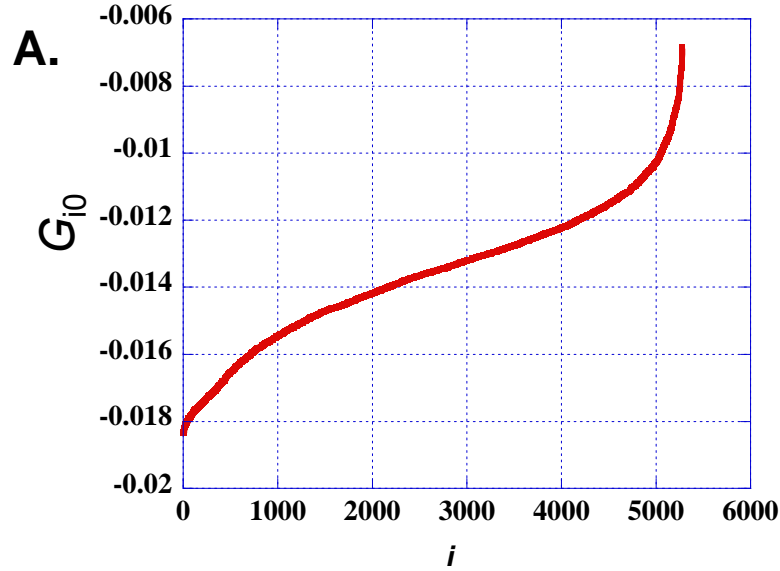

**B.**

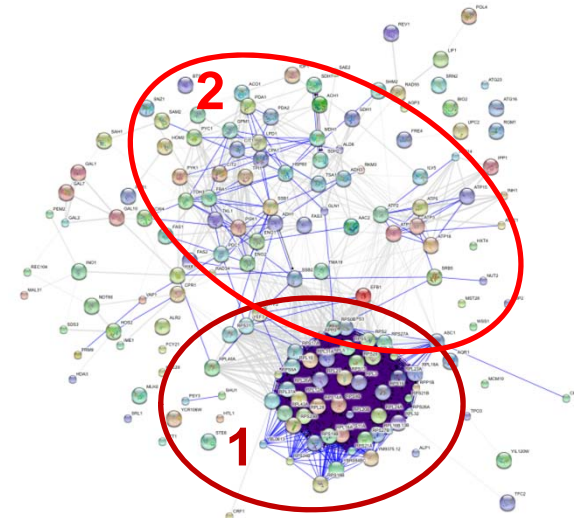

**C.**

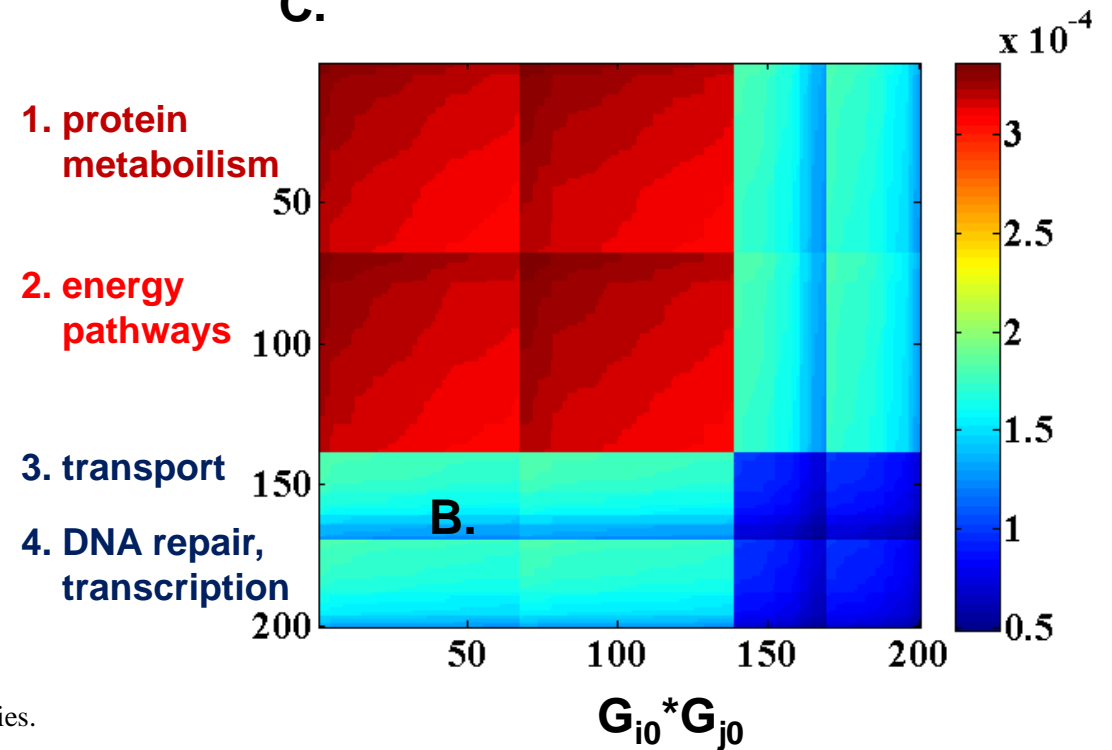

Figure S9. Comparison between the experimentally proved structure obtained from the  $G_{i0}$  values and the  $G_{i0}G_{j0}$  heatmap in yeast.

(A)  $G_{i0}$  distribution (B) Connectivity of the 200 probes, 140 most stable and 60 least stable transcripts are shown.

(C) A heatmap of the corresponding values.

The transcripts are labeled according to Gene Ontology categories.



**A.**

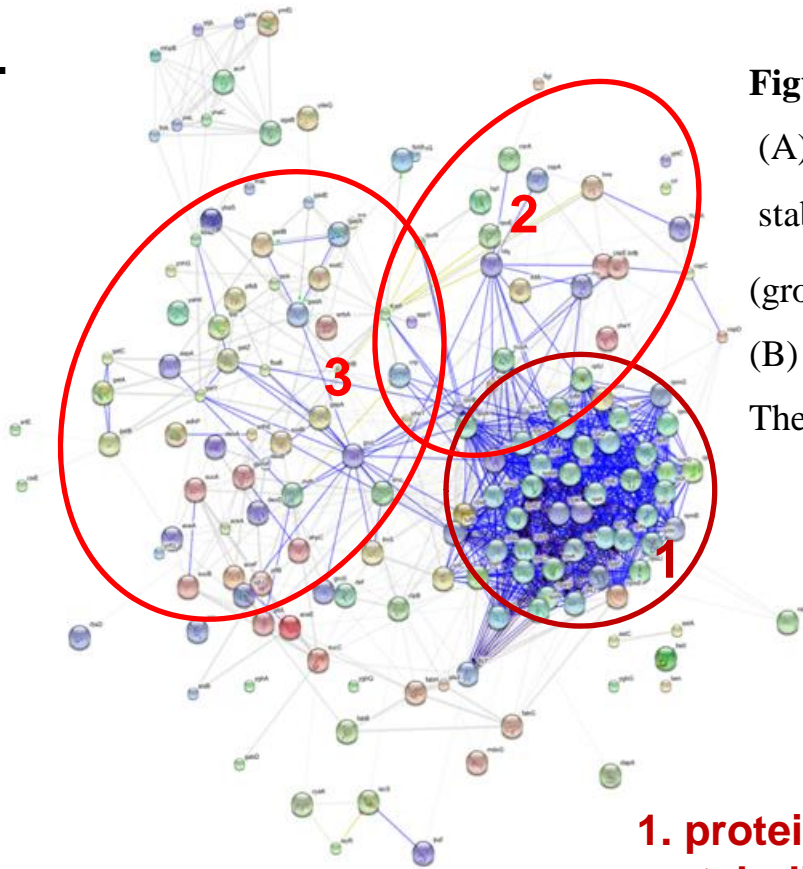

**Figure S10. Predicting the connectivity of transcripts in E.Coli.**

(A) Connectivity of 220 transcripts, 160 most stable and 60 least stable transcripts are shown. The transcripts with high  $G_{i0}$

(groups 4, 5 and 6) are sparsely connected.

(B) A heatmap of the corresponding values.

The transcripts are labeled according to Gene Ontology categories.

- 1. protein metabolism**
- 2. transcription**
- 3. energy pathways**
- 4. DNA replication**
- 5. transport**
- 6. mixed**

**B.**

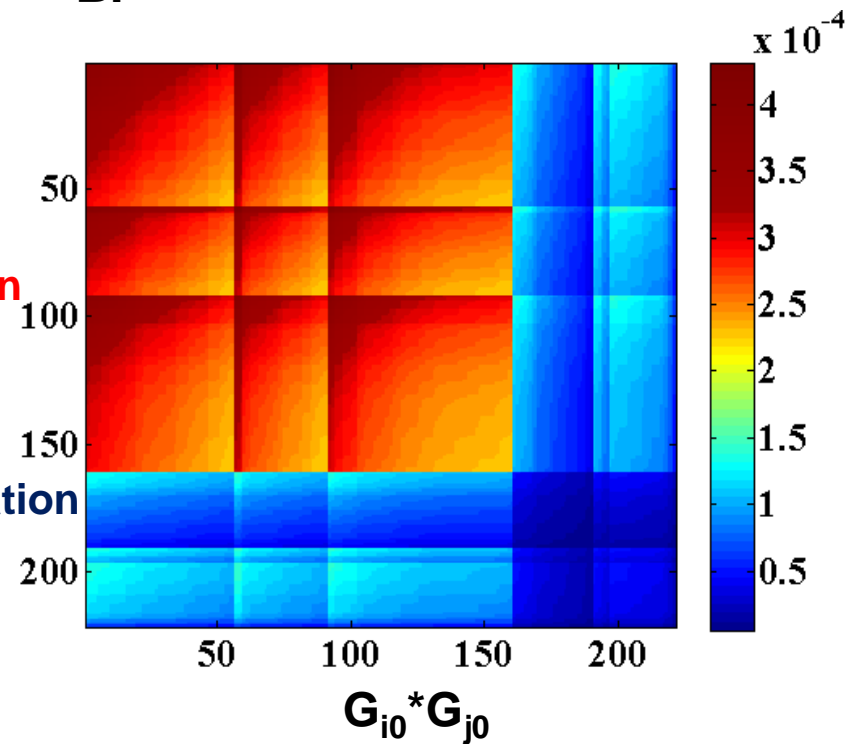

**Figure S11**

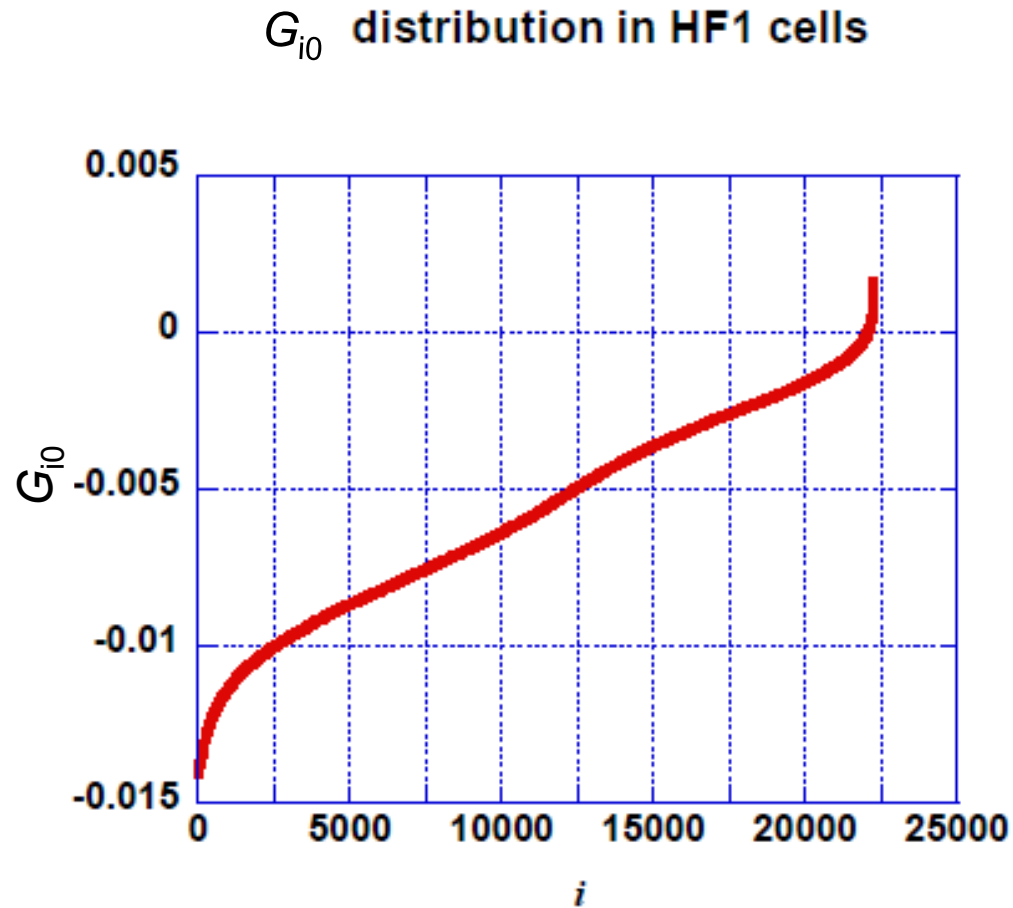

**Figure S11.**  $G_{i_0}$  distribution in the HF1 immortalized cellular model.

Transcripts with the most negative values strongly contribute to the steady state.

Figure S12

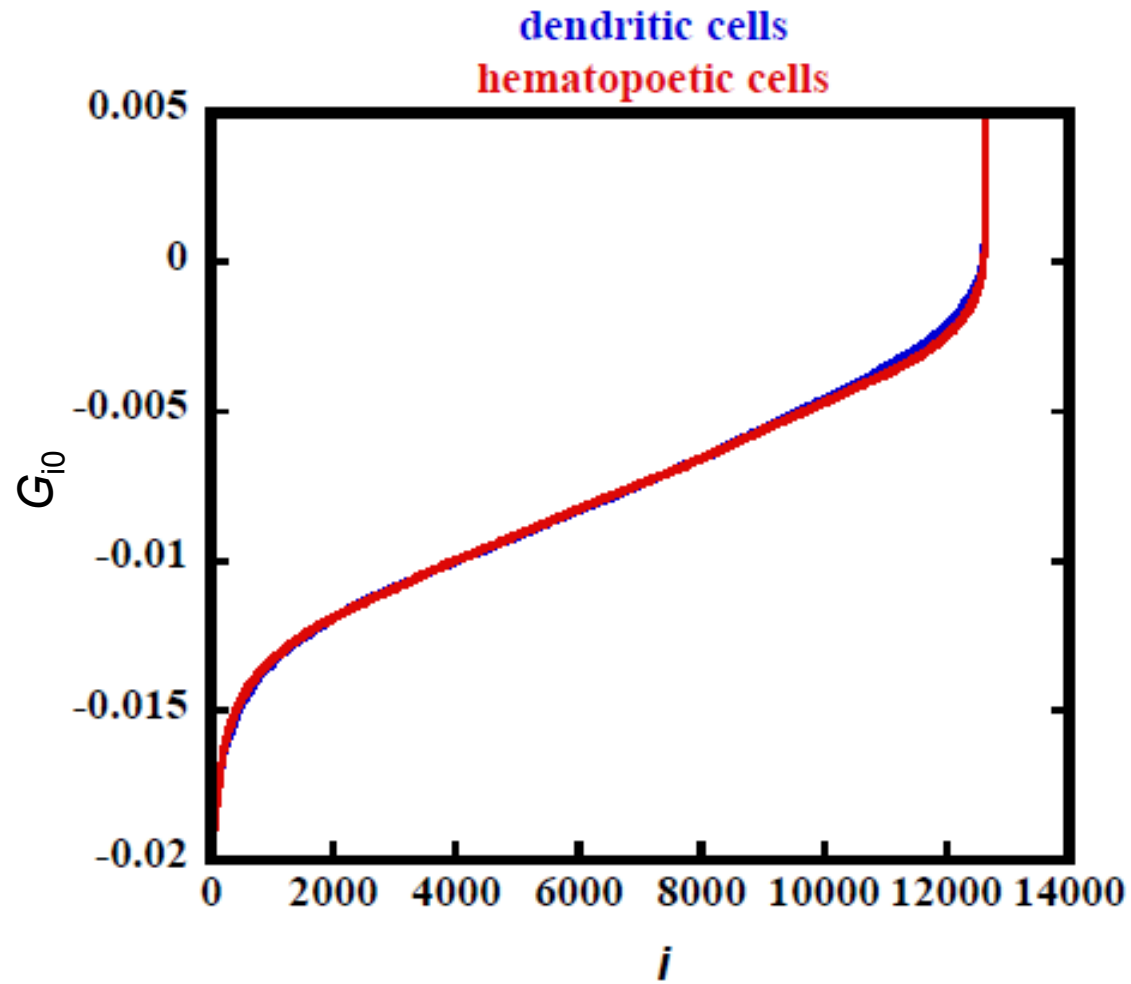

**Figure S12.**  $G_{i0}$  distribution in the dendritic (blue curve)/ hematopoietic (red curve) cells.
